# Supplementary material for: Increased taxon sampling reveals thousands of hidden orthologs in flatworms
Source: HighWire-hosted journal article supplement (doi:10.1101/gr.216226.116), 2017-04-11
Supplement: Supplemental_Table_1.docx [file Supplemental_Table_1.docx]

**Supplementary table 1. Transcriptomes analyzed in this study**

| **Species** | **Group** | **Source** | **Depth (bp)** |
| --- | --- | --- | --- |
| *Austrognathia* sp. | Gnathostomulida | Laumer, et al. (2015) | 12,897,815 |
| *B. candida* | Platyhelminthes | Laumer, et al. (2015) | 22,365,603 |
| *B. balticus* | Platyhelminthes | Laumer, et al. (2015) | 11,257,706 |
| *B. semperi* | Platyhelminthes | Laumer, et al. (2015) | 56,081,914 |
| *D. lacteum* | Platyhelminthes | Laumer, et al. (2015) | 115,254,878 |
| *F. magna* | Platyhelminthes | Laumer, et al. (2015) | 33,048,065 |
| *G. applanata* | Platyhelminthes | Laumer, et al. (2015) | 84,830,526 |
| *G. tigrina* | Platyhelminthes | Laumer, et al. (2015) | 28,510,283 |
| *Gnosonesimida* sp. IV | Platyhelminthes | Laumer, et al. (2015) | 49,489,839 |
| *H. microstoma* | Platyhelminthes | Tsai, et al. (2013) | 14,805,351 |
| *K. amphipodicola* | Platyhelminthes | Laumer, et al. (2015) | 51,328,359 |
| *Lehardyia* sp. | Platyhelminthes | Laumer, et al. (2015) | 9,340,372 |
| *L. patella* | Rotifera | Laumer, et al. (2015) | 1,846,131 |
| *L. squamata* | Gastrotricha | Laumer, et al. (2015) | 61,247,222 |
| *M. ruebushi* | Platyhelminthes | Laumer, et al. (2015) | 32,818,396 |
| *M. lignano* | Platyhelminthes | SRA (SRX1343824) | 146,421,223 |
| *Microdalyellia* sp. | Platyhelminthes | Laumer, et al. (2015) | 15,908,586 |
| *M. lineare* | Platyhelminthes | Laumer, et al. (2015) | 104,592,789 |
| *M. fusca* | Platyhelminthes | Laumer, et al. (2015) | 107,319,077 |
| *P. alpinus* | Platyhelminthes | Laumer, et al. (2015) | 33,251,738 |
| *Prorhynchus* sp. I | Platyhelminthes | Laumer, et al. (2015) | 35,939,907 |
| *P. riseri* | Platyhelminthes | Laumer, et al. (2015) | 11,833,063 |
| *P. vittatus* | Platyhelminthes | Laumer, et al. (2015) | 361,770,473 |
| *Protomonotresidae* sp. | Platyhelminthes | Laumer, et al. (2015) | 26,049,265 |
| *P. sphagnorum* | Platyhelminthes | Laumer, et al. (2015) | 3,673,073 |
| *R. rostratum* | Platyhelminthes | Laumer, et al. (2015) | 54,514,686 |
| *S. mansoni* | Platyhelminthes | Berriman, et al. (2009) | 120,642,446 |
| *S. mediterranea* | Platyhelminthes | Laumer, et al. (2015) | 37,838,721 |
| *S. mediterranea* (BE) | Platyhelminthes | Adamidi, et al. (2011) | 26,258,087 |
| *S. mediterranea* (DD) | Platyhelminthes | Brandl, et al. (2015) | 51,791,386 |
| *S. mediterranea* (MU) | Platyhelminthes | Sandmann, et al. (2011) | 31,092,796 |
| *S. mediterranea* (OX) | Platyhelminthes | Kao, et al. (2013) | 59,986,795 |
| *S. mediterranea* (TO) | Platyhelminthes | BioProject (PRJNA205281) | 30,446,539 |
| *Solenopharyngidae* sp. | Platyhelminthes | Laumer, et al. (2015) | 15,247,204 |
| *S. leucops* | Platyhelminthes | Laumer, et al. (2015) | 79,082,476 |
| *S. ellipticus* | Platyhelminthes | Laumer, et al. (2015) | 129,598,829 |
| *Xenoprorhynchus* sp. I | Platyhelminthes | Laumer, et al. (2015) | 20,991,891 |
