# Supplementary material for: Increased taxon sampling reveals thousands of hidden orthologs in flatworms
Source: HighWire-hosted journal article supplement (doi:10.1101/gr.216226.116), 2017-04-11
Supplement: Supplemental_Table_2.xlsx [file Supplemental_Table_2.xlsx]

## Sheet: Hidden genes
Austrognathia sp.	Lepadella patella	Lepidodermella squamata	Stenostomum leucops	Microstomum lineare	Macrostomum cf ruebushi	Macrostomum lignano	Stylochus ellipticus	Xenoprorhynchus sp. I	Geocentrophora applanata	Prorhynchus sp. I	Prorhynchus alpinus	Gnosonesimida sp. IV	Lehardyia sp.	Microdalyellia sp.	Rhynchomesostoma rostratum	Provortex cf sphagnorum	Solenopharyngidae sp.	Prosogynopora riseri	Monocelis fusca	Bothriomolus balticus	Protomonotresidae sp.	Kronborgia cf amphipodicola	Bdelloura candida	Dendrocoelum lacteum	Girardia tigrina	Schmidtea mediterranea	Bothrioplana semperi	Schistosoma mansoni	Fascioloides magna	Hymenolepis microstoma
EVC2	C9orf85	C14orf80	METTL23	MRPL37	RNMT	CMC4	C5orf45	SLBP	CYB561D2	TWISTNB	ZMAT1	TBCA	POLR1A	EXOSC8	C17orf97	SERBP1	CCDC66	NUP188	CCDC138	CCDC166	TMEM199	MRPL27	SZT2	ADPRHL2	TMEM237	ACRC	GOLGA1	POLA2	CCDC60	TCHP
LOC101929469	AKAP7	SURF6	MRPS27	CCDC166	CRCP	NMRAL1	TEX11	KLHDC9	FAM185A	DACH1	WIBG	UBAP1	ALG2	TPCN2	C14orf1	TMEM184B	CEBPZ	IQCD	ARV1	ZNF503	NANOS1	NEMP2	RIF1	CRCP	DTNBP1	ADRM1	TOR1AIP1	TBCA	SPATA18	MRPS30
TMEM128	KIN	TMEM134	TTC24	TMEM199	RRBP1	COX16	LAMTOR1	EMC1	COA1	COG1	SMOC2	TWISTNB	MRPL35	RGS22	GCC1	CD63	SLC50A1	CCDC88A	PRAMEF14	CWC15	LAS1L	CCDC166	EIF3J	KLRG1	CCDC142	AKNA	KIAA1217	DPH6	BBS5	VIPAS39
CEP164	HSPB2	ATP5I	METTL25	AKNA	MRPL48	LAMTOR5	C20orf27	MRPL40	TWISTNB	TPR	CTTNBP2NL	CREBRF	LOC100996634	SAMD3	AP5M1	FAM129B	MRPS25	DCDC2	CCDC34	SLC8A1	SLC48A1	TMEM101	PMFBP1	TMEM256	PSMG2	ALKBH6	SPATA7	HIP1R	C2CD2	CHMP6
NAPRT	EMC4	IER3IP1	PEX16	PRAMEF14	CYB561D2	POLR3D	COX16	ORC1	C14orf80	C14orf80	PIGV	TMEM134	UQCR11	LOC100996634	C12orf66	PLEKHA3	AKAP13	GSS	CLDN10	CCM2	BAG1	GPM6B	PACS2	THNSL2	C7orf26	AP5M1	ARSB	IRF2	SPAG8	CEP152
SORD	MRPL18	PHYH	MRPL10	CARF	NUPL1	HYLS1	COA1	STOX1	PRAMEF14	EXOSC6	KIAA0825	FUNDC1	AIFM1	INO80C	FAM185A	ZFYVE19	NASP	MRPL24	CCDC166	LOC105372267	MAD2L1	SLC48A1	GPM6B	TIPRL	FSIP1	APOOL	ESPL1	C2CD2	TMEM9B	PTCD3
EIF3J	ADTRP	GMNN	FBXO21	TMEM143	NRSN1	C5orf45	FAM103A1	C2CD2	MDM1	RPA3	TTC23	CCDC150	PHF8	ZNF385B	FAM103A1	TXLNG	SCG5	C17orf98	C20orf96	MTUS2	TMEM70	EDC3	MCC	TMEM234	BNIP1	AQP11	SHFM1	GOLGA2	LAMTOR1	BOK
BTBD7	SYS1	PYCRL	MRPL40	HYKK	MRPL10	PET117	TMEM177	GTF3C4	BAHCC1	NSRP1	C7orf72	RPP30	RGS22	FHAD1	CDT1	MORN3	DYX1C1	DIP2A	ESPL1	YIPF6	WDR54	NOXRED1	TOMM22	MED11	EFCAB12	ASPDH	TMEM134	VPS39	GTF3C1	RNASEH2B
GPAA1	NGLY1	C5orf45	SERF2	GPALPP1	DOT1L	MRPL35	NDUFB10	IFT43	CCDC24	MRPL40	COL15A1	TMEM234	COX15	DTWD1	C20orf27	NDUFS5	TMEM47	CRCP	LRMP	MRPL49	TOMM22	HERPUD1	DEF6	SAMD10	SRRM2	ATP5I	PSMG3	SH2B2	CEP295	ZNHIT2
MPV17	GK	LKAAEAR1	NDUFB10	RNF220	C20orf96	TMEM254	SMPD3	NDUFB3	MPHOSPH9	ZNF503	C9orf85	STX17	LIN9	MRPL21	NDUFAF4	SH2D5	TDRD1	SYPL1	PET117	MRPL51	NTHL1	DPM3	GLT1D1	CCDC150	MYD88	AUP1	MYD88	PAPD4	TMEM138	GMNN
HEATR9	XPNPEP1	LOC100996634	BIRC5	TTC23	PLA2G5	NRSN1	C7orf55	MSL3	LSM11	WRB	AKAP17A	C12orf57	FSIP1	ASRGL1	TOMM22	C8orf37	C8orf89	MACROD2	ZSWIM1	MRPL35	TMEM258	HAX1	NDUFA1	SMKR1	TTI2	BATF2	EVC2	JAGN1	BBS9	GLMP
MOSPD2	SSR1	F8A1	FAM206A	COBLL1	GLMP	CHCHD4	PET117	OFCC1	SRRD	PRRC1	CCDC24	DTNBP1	MRPL17	CEP112	C19orf70	C10orf82	SLC39A9	AP5Z1	MRPL34	TMEM167A	TPGS1	SFI1	C1QBP	CMC1	C10orf67	BNC2	ERC1	BTBD7	NDUFAF4	GPM6B
CCDC83	TNNI1	FSIP1	ECSIT	FAM185A	MIIP	MRPL22	PPP1R35	CASZ1	MTUS2	CUEDC1	SMPD3	TACO1	NDUFA13	C2CD2	TMEM179	MAEA	FAM228B	TPGS1	NGB	TPGS1	WRB	OAZ1	TMEM39A	MRPL50	C5orf45	BNIP1	CEP295	HHAT	C3orf67	EXOC1
ACBD3	MRPL32	HERPUD1	TEX43	CCDC57	MRPL44	SMIM20	TWISTNB	TPGS1	RETSAT	SAMD4A	OSTM1	POMP	ADAP1	PLD6	IFT22	VDAC1	URB1	MRPL16	FSIP1	CYB561D2	ADAT3	TCTN3	CCDC66	TRIAP1	TMEM143	BTBD17	SLC48A1	VIPAS39	VHL	SPARC
CLRN2	AIFM1	C2orf73	SLC35F3	MRPL50	COA7	NUDT19	UBAP1	CCDC67	CCDC125	AKNA	CCDC125	TMEM47	GLMP	GCC1	C1orf27	GGCT	MRPL32	IRF2	MIIP	CMC4	MRPS7	IFT20	KIAA1257	GEMIN6	ASCC2	C10orf67	TMEM101	TUBGCP6	ZC4H2	ZNF839
MED31	D2HGDH	LAS1L	TMEM198	CEP57L1	TRDMT1	C8orf33	PRAMEF14	NOC4L	BBS12	C11orf88	VIPAS39	CEBPG	MTTP	CEBPZ	MED11	ABHD6	MROH1	PDSS2	CCDC142	FBXO25	FAM177A1	GATC	ANKFN1	KIAA1524	WHAMM	C14orf80	SARNP	NARFL	TMEM47	MRPL10
C16orf93	PAPD4	PPHLN1	ATP5I	FAM103A1	CBY1	C9orf173	CCDC142	ASMTL	FAM65B	ZMYND15	CCDC166	TMEM256	RANGAP1	ALG14	MRPS30	TEX43	IFT43	SMG9	NOTUM	ZNHIT6	ORC4	NGB	ATPIF1	C18orf32	COA1	C17orf97	TMEM9B	IBA57	MRPL27	IQCK
PRKRIR	TPRA1	LHFPL2	FSIP1	CCDC18	CCDC51	MRPS15	C19orf70	SLC35A4	TMEM132C	HEATR9	ZSWIM3	SHFM1	SLC38A9	CCDC24	MMS19	HECA	F8A1	MRPL39	MRM1	MRPL21	SPARC	CCDC89	SNX13	MRPL35	NEMP2	C19orf70	CCDC18	BDP1	TBCA	TMEM177
FAM227A	PDE12	CLDN10	DCP1B	NHLH1	TAZ	C19orf70	CLDN10	ZNHIT6	SAAL1	CDT1	FAM8A1	C10orf53	RB1CC1	FITM2	PIFO	MROH1	LOC102725191	KIAA1328	PPP1R35	PIGN	GGCT	BET1	SPAG8	CMC4	VEZT	C1QBP	TMEM234	AIFM1	PSMG3	EXOSC5
IQCK	NDUFB5	AKAP17A	RPP25L	C20orf96	M6PR	ECSIT	NDUFAF4	C19orf70	SPICE1	IPPK	RRP15	CCDC115	BUB1B	IQCD	SMKR1	LOC105375007	PSEN1	NDUFAF4	SHFM1	LOC100996634	PIH1D1	TEX43	DOK1	LKAAEAR1	RB1CC1	C5orf45	TMEM198	TMEM104	MKI67	SCG5
TMEM177	TMEM131	SH2D5	HYLS1	TMEM47	CHMP6	MRPL50	MRPS27	ZNHIT1	CCDC64	SMPD4	MVB12B	WRB	EPS8	POLR3H	MAD1L1	CWC25	MRPL40	MDP1	ANAPC5	NOG	PEX11B	SPATS1	MAP10	C2orf69	TMEM47	C6orf118	C19orf70	ADTRP	CCDC142	GTF3C4
C5orf49		ZNF503	GFRA3	NDUFAF2	GTF3C5	MRPL27	TOR1AIP1	EXOSC6	LEKR1	RGS22	KIAA1217	SMIM20	GOLGA4	GMNN	NDC1	FAM214A	FRRS1	KIAA1919	LSM11	GTF3C1	MKRN2OS	NPTX1	CCDC34	MRPS23	AKNA	C7orf31	ALMS1	LAPTM4A	RTP4	SDS
CCDC34		NEMP2	ATOX1	MAP10	RTTN	MRPL40	FBXO43	C6orf118	VEZT	NUP54	CYB561D2	BNIP1	RAD51	SPG11	CCDC166	GPAA1	COG6	ATP5H	PIGH	DCDC5	TMEM134	OTOP2	IRF2	EIF1AD	HYKK	C8orf33	GRIPAP1	URB1	C19orf44	SHFM1
FBXO21		LOC105375007	NSRP1	C5orf45	KLHDC9	NPAT	CUEDC2	C20orf27	LOC101928793	FAM185A	STX17	TMEM177	SPAG8	DZIP1L	TMEM138	LOH12CR1	YIPF4	PRPF3	MAP10	MBOAT7	LOC102724828	TMEM143	NCOA4	BNIP1	AKAP9	CCDC142	CCDC34	CCDC174	MRPL50	FBXO18
KRI1		CCDC166	MRPL50	TOR1AIP1	TMEM39A	BLOC1S6	CCDC18	NBN	ZMYND15	FAM227B	FBXO36	NDUFS5	FAM227A	C17orf49	APOOL	ARPP19	MRPL51	LAMTOR1	KIAA1467	SAMD15	TIMELESS	CCDC17	C10orf67	ZNHIT2	NUDT19	CCDC157	CCDC158	PET117	SHFM1	TTI2
PMFBP1		PRAMEF14	PROSER3	TMEM198	LRP2BP	LAMTOR4	CALCOCO2	RABEP1	KIAA1467	FBXO25	PPHLN1	LYSMD3	SZT2	ODF2	SNRNP27	CCDC66	TOMM40	ORC1	TMEM186	ATG2B	ATXN7L3	CHCHD4	MTTP	CCDC166	TPGS1	CCDC158	ZNF839	SDAD1	TWISTNB	MRGBP
RNASEK		FBF1	PRAMEF14	POLR3GL	CLHC1	SAMD10	FAM155B	TMEM237	CCDC142	VEZT	TMEM134	TTI2	LOC400499	HYKK	AQP11	NDUFA13	CABLES1	MRPL35	EFCAB12	IQCK	NDUFAF4	FAM155B	RPL28	TEX43	GTF3C4	CCDC166	TWISTNB	COX6C	MRPL10	TMEM143
FIBP		CEP152	SLC39A3	SLC35F3	TMEM35	MRPL10	VIPAS39	IBA57	AKNA	MEIOB	MRPS15	COA1	PPP1R32	MRPL27	ANAPC4	MIOS	CXorf56	AKAP7	C6orf118	MRPS30	C20orf96	PM20D2	TNRC6A	COX16	POLR3C	CCDC17	ZSWIM3	SLC30A9	EXOSC6	IBA57
MTUS2		CTAGE5	TBCA	C17orf97	CCM2	GTSF1	TGOLN2	LAMTOR3	CCDC57	TMEM232	SPAG8	LAMTOR5	MKI67	ZCCHC2	SURF6	MON1A	LOC102724828	UBXN4	C1orf87	FBXO47	C9orf135	C7orf62	BOK	CCDC125	PFDN1	CCDC174	CWC25	PAN3	TTI2	HYLS1
FAM129B		STOX1	LENG1	LHFPL2	GTF2E1	C2orf73	PROSER3	NDUFAF4	AMN	C19orf44	GPM6B	NEMP2	MRPL10	CCDC178	C1QBP	ZC4H2	ECSIT	PSMG2	PIGX	PPP1R32	GTPBP6	HEATR9	GATAD2A	TAF9	BLVRB	CCDC177	MTUS2	SCLT1	TPX2	VPS37B
CCNY		MTTP	ZNF503	MRPL35	ELMO1	FBXO47	LAMP5	MRPL30	FBXO18	FAM126A	PRRC1	NDUFB10	VPS37B	SPATS1	TMEM47	DIS3L2	MBLAC1	CNPPD1	PROX1	CROCC	COMMD4	CRCP	PPP1R10	TEX261	CEP152	CCDC178	MRPS15	F8A1	BLOC1S2	RIN2
TCTN1			FOPNL	GON4L	MMP21	LYSMD3	NPAT	LOC101929469	SMG9	FBXO39	TCHP	MRPL48	HEATR9	TGS1	MRPL27	ZCCHC11	PLA2G5	CFAP46	ATP5H	SPAG17	COA1	ESCO2	BCAP31	PBDC1	ANAPC5	CCDC181	HBZ	FBXO7	BNIP1	C19orf52
C6orf118			PET117	FBXO43	CCDC18	TMEM123	C8orf76	SASH3	MRPL35	PPHLN1	ZNF503	DGCR6L	NSUN2	RPRD1B	MPHOSPH9	METTL24	SNX14	C10orf82	C8orf89	FAM228B	PGS1	CTAGE5	SH3BP5L	RPA2	WRB	CCDC34	FAM155B	EXOSC6	C19orf70	MTTP
C10orf67			TMEM179	CLDN10	PUS3	MDM1	UBE3D	MRPL10	CLDN10	MRPL35	HAX1	MED18	MAP2	CAND2	MIEF1	SPON1	INTS7	BROX	EVC2	ZNHIT1	CEP295	TTC23	EVC2	BEGAIN	LENG1	CCDC57	FAM65B	SMPD4	PTAR1	MRPL50
HEBP2			MRPS30	SAMD10	UQCC1	CEP57L1	NELFA	AFTPH	FAM155B	CEP89	AKNA	CD2BP2	PEX16	C2orf81	TMEM101	SPARC	FAM129B	PHTF2	FAM103A1	TTI1	TMEM101	CCDC13	ZSWIM8	RPP25L	GOLGA3	CCDC66	PTCD3	RFT1	F8A1	MED20
GPN3			SON	MED11	ZNF839	TPX2	MTFR1	NUP210	MRPL50	LOC100996634	BCCIP	PEX16	ZNF862	M6PR	NDUFS5	SPEF2	EIF3M	C19orf70	SLC48A1	C9orf171	MRM1	SLC35F3	CCDC115	TMEM128	EVC2	CCDC83	AHCTF1	EXOC4	C16orf72	CCDC64
TDRD12			C14orf80	ZSWIM1	FAM92B	CCDC166	ZSWIM3	AMN	DISP1	RIC8A	ZNF839	SASH1	IRAK1BP1	MRPS27	MRPS15	AUH	C17orf97	BLOC1S6	VHL	EHD1	NPAT	SNAPC1	CNTLN	MRPS15	C8orf33	CCP110	MKRN2OS	PPP6R1	C20orf27	NCSTN
CCDC89			HEATR9	FAM210A	CEP128	SUDS3	PTCD3	C2orf73	COX6C	C2CD2	PET117	FAM228B	APLF	MEAF6	EXOSC6	C16orf93	TMEM17	DTHD1	TMEM254	IQCE	C12orf66	MRPS27	ATXN7	C7orf62	LRMP	CEP128	TNRC6A	PTCD1	BAG1	FAM126B
KIAA2012			EVC2	MTFR1	ZCCHC2	CBY1	MPHOSPH9	NAGS	CCDC105	INO80E	EXOSC6	PIGX	PRKCSH	ATOX1	SMPD3	RFX3	BLOC1S6	NOG	C3orf20	MRPL10	SFI1	FOPNL	CEP152	CCDC115	GON4L	CEP152	C1QBP	PTCD3	MRPS27	NDUFB11
TRPT1			PMFBP1	VEZT	POLD2	MAP10	MTBP	KIAA0195	CCDC34	NMRK2	CNTLN	MRPL50	CCDC83	MED23	MRPL35	BTBD17	CCDC33	FAM76A	CCDC57	TMEM47	PSMF1	MED18	SAAL1	PTRHD1	RPP25L	CFAP46	MZT2A	VPS51	TOR1AIP1	NDUFB10
KIAA0825			CCHCR1	MRPS15	WDR93	NMRK2	MAP10	DNAAF3	GTF3C4	C3orf67	CCDC17	MRPS15	NDUFB9	NCOA4	CHPF	CEP19	SPAG8	MRPL50	JAGN1	ARFGEF3	C10orf32	MRPL48	MPHOSPH9	C19orf52	CCDC166	CFAP53	TMEM186	ECSIT	GPR180	GON4L
PLIN2			C10orf53	TACO1	PIGQ	C8orf37	BBS12	PET117	LRMP	CCDC115	HERPUD1	CCDC142	COA1	UHRF1BP1L	SPAG8		PIGW	CCDC18	CRCP	CCDC42B	CPPED1	CCDC150	GLMP	TMEM17	CCDC57	CFAP54	C20orf96	CCDC57	SCLT1	UBAP1
SSR1			SAMD10	NDUFS5	DEDD	MIPOL1	ASXL3	EXOC2	EVC2	CDC45	COA1	EIF3J	CCDC74B	PATL1	C19orf52		TMEM259	TSHZ1	MRPL35	TRIP11	PATL1	CHCHD7	NASP	TMEM170B	CYTB	CHAF1A	TMEM237	GSS	TSSC4	RB1CC1
NDUFB10			TWISTNB	PET117	NOP9	GTF3C4	FAM129B	TMEM53	VIPAS39	CCDC74B	ALMS1	ZNHIT1	VPS13A	TOR1AIP1	LSM12		NDUFB11	ZCCHC2	NPAT	FHAD1	PIGH	C7orf26	SCLT1	TMEM9B	CCDC17	CHCHD4	MRPL27	CYB561D2	GON4L	FAM185A
KANSL2			FBXO7	TP53BP1	MCM3AP	TMEM47	CCDC57	AKNA	EBPL	SCLT1	APOOL	MRPS27	LOC105375007	ZW10	NOP9		CYB5D2	SHFM1	ZSWIM3	C19orf52	HIGD1A	CLDN10	CCDC158	FAM92B	ALMS1	CHPF	GMNN	C7orf62	PFDN1	EIF3J
ATPIF1				MKI67	HDGFRP3	TMEM128	TMUB1	ZNF503	TMEM198	NOXRED1	MDM1	C20orf96	C2orf81	KDM1A	LAS1L		TMEM62	PLEKHH1	CCDC24	SPATA1	C6orf118	GHDC	ORAI2	FAM206A	C19orf70	CLDN10	MIEF1	PIGX	C5orf45	C7orf62
CCDC105				SSX2IP	FSIP1	ANAPC5	CCDC66	KIAA1407	PPP1R35	TMEM101	CCDC158	DFNA5	KIAA0895L	SZT2	HENMT1		MALSU1	MYD88	COA1	OFCC1	FAM155B	MPHOSPH9	DAXX	DPM3	MAP10	CLRN2	CLDN10	CLNS1A	COBLL1	GOLGA3
TMEM19				MRPS30	CCDC57	AP5M1	OTOA	SELM	CCDC18	CCDC157	CCDC181	METTL25	AKAP14	RTP4	MTTP		THOC7	C2orf81	COBLL1	FAM179B	TMEM143	GTF3C1	STAG1	RTP4	ZC3H18	CLSPN	MED11	MRPL35	RRBP1	NDUFA1
TMEM104				MRPL10	ATG101	GLMP	OST4	MED12	EXOSC6	RTTN	GFRA3	TAB2	PDCD2L	TMEM131	LYSMD2		CCDC17	CIR1	PRR5	FAM173B	ZC3H18	ZNF839	CCDC64	C1QBP	ZNF503	CNBD1	TMEM47	NDUFB10	GLMP	RSPH14
PPP1R36				ATP5I	PET117	TMEM53	MND1	NDUFB11	C7orf26	HDHD3	FBXO39	CEP85	TIMM23	ZNF385D	TOR1AIP1		CCDC57	HHAT	EBPL	CTNND2	CNTLN	MRPL10	CRCP	MRPL54	NSRP1	COA1	TMUB2	SYN2	ZNF839	PSMF1
C19orf52				NEMP2	EI24	FAM129B	IRF2BP2	IQCK	NDUFA1	POLR3GL	AUP1	KIAA1524	ALMS1	CEP95	CCDC74B		TMEM35	IFT74	C8orf33	COG4	C1orf87	MTTP	MRPS23	VPS37B	MRPL27	COBLL1	COX16	MFSD3	METTL23	HBZ
AGPAT6				MRPL27	FBXO33	CCDC34	ZSWIM1	CCDC24	MRPS15	SSX2IP	C1orf106	STOX1	PCF11	GAB1	FAM126A		TPCN2	ASUN	TPX2	MRPS16	ZNHIT2	MAPKAP1	TMEM231	TMEM107	C8orf89	CRAMP1L	SMPD3	GLMP	NDUFB11	TOR1AIP1
CSPG4				SMPD3	ANAPC10	CCDC142	STX8	PPT1	NHLH1	C20orf96	CEP89	TTC23	SNX32	GSE1	ANAPC5		VIPAS39	CCDC177	MTFR1	PPCS	HERPUD1	GTF3C4	ZSWIM1	MED22	BTBD17	CRCP	HAX1	MRPL40	NCOA4	FAM155B
CCDC33				APOOL	FITM2	BLOC1S4	MED11	UTP20	HAX1	EIF3J	KIAA2012	TMEM237	SAMD15	LAMTOR5	CCDC57		NCKAP1L	ADCY9	TMEM143	PMFBP1	SPAG8	C10orf67	PIFO	HYKK	SDCCAG8	CTAGE5	UQCR11	GTF3C4	FAM155B	TBCA
MRPL17				CCDC158	KIAA0391	KIAA1524		OSCP1	SMPD3	PET117	LOC101928793	FBXO39	MRPS15	VWA3B	IFRD1		CCDC40	C1QBP	C5orf45	SCAPER	NGB	PET117	CEP131	NUS1	FAM228B	CTTNBP2NL	MSL3	RTFDC1	INTS10	LOC102724828
PPOX				TMEM256	BATF2	MRPS27		NUS1	NPAT	PITPNM3	NDUFAF4	C7orf26	SLC50A1	SPARC	FBXO4		TMEM123	STRA6	MZT2A	LITAF	CHMP7	ECSIT	RNMT	CCDC83	LYRM7	DAG1	EOGT	ASPSCR1	ECSIT	XRRA1
THNSL1				MTBP	HAAO	GDPD2		MED31	RIF1	CYB561D2	FBXO15	NSRP1	TMEM237	HTT	GFRA3		TCTE1	THUMPD2	PLA2G5	CCDC81	MAPKAP1	INTS10	MRPL48	MOCS2	HAX1	DEK	NPTX1	RPP25L	FBXO7
CNBD1				LENG1	SEC16A	ZCCHC2		MDP1	OAZ1	SMPD3	RGP1	USMG5	ANOS1	ESPL1	C10orf67		DAGLA	CCDC158	C10orf53	MRPL37	SPICE1	BIN3	FAM183A	TMEM199	NCOA4	DGCR6L	SNAPC1	MKI67	AQP11
C17orf49				EVC2	CEP89	TAB2		GFRA3	INO80E	MRPL50	BLOC1S6	LENG1	IDI1	BNIP1	C2CD2		FAM58A	RPA1	TMEM134	WBP4	UBAP2L	FSIP1	C14orf166	TMEM60	PSMF1	DNTTIP1	ECSIT	CCDC169	TMEM101
VPS37B				TMEM237	POLA2	ZNF839		GGCT	MED1	XKR6	INO80E	C6orf118	EIF4G2	ATP5I	NCOA4		SH3BP5L	PGAP3	GMNN	CRHBP	MAD1L1	ALMS1	CCDC51	DCTN3	EXOSC6	DNTTIP2	BTBD17	ZNF511	RTTN
CCDC57				C19orf70	KIAA1467	TELO2		PPHLN1	CNPPD1	C1orf87	SECISBP2L	MIEF1	SPARC	LITAF	EVC2		C20orf27	CCDC57	TPRKB	MRPS15	ARL14EP	HBZ	MRPL27	TMEM70	NDUFA10	DPH6	RTTN	DCPS	ALMS1
POLR2H				CTAGE5	GEMIN6	RNASEH2B		ABT1	LOC101929469	LOC102723897	NUFIP1	ESPL1	MGST3	DOK7	MED27		YIPF1	CSDE1	FAM155B	KIN	SHFM1	SASH3	DYM	NOXRED1	UBAP1	DTNBP1	TMEM53	CLSPN	OSTM1
C20orf96				MZT2A	AIFM1	SMCR8		PLEKHD1	PET117	RRNAD1	AMN	GON4L	C1QBP	EXOC3	SAAL1		SERGEF	TSNAXIP1	GTSF1	DPH6	ERICH2	TMEM199	TPD52	DGCR6L	CLDN10	EOGT	HEATR6	ZNF839	TMEM177
				NDUFB10	RPP25L	UBAP2L		COA1	C16orf72	CCDC34	CCDC67	TTC24	BOK	LRRFIP2	GOLGA3		MOCS1	MLEC	IBA57	ARL6IP1	MVB12B	TMEM60	CNOT11	RPP30	LKAAEAR1	ERCC1	ICE2	TTC8	STOX1
				CEP295	KIAA0825	EXOSC6		ADTRP	NHEJ1	ECSIT	INTS10	MRPL37	PBDC1	TPGS2	GRIPAP1		PNN	SMYD2	CCDC158	MRPS6	GRAMD3	PATL1	UTP3	CHCHD4	NASP	ERICH2	VPS54	CCDC86	UBAP1
				GDPD2	LMF1	EVC2		EVC2	CHMP7	CD2BP2	BAHCC1	UBAP2L	DNAAF2	PLXNA1	DNTTIP1		KIAA0430	LHPP	HAUS6	LOC646730	CHCHD4	C19orf44	CCDC90B	PRR5	TMEM177	EVC2	MFSD3	SNRNP25	CFAP53
				APLF	BNIP1	APLF		MPDU1	TMEM242	CCM2	EFCAB12	CCDC17	NBR1	SDAD1	PIGZ		GPR155	PLIN2	GRIPAP1	DOK1	FAM129B	MRPL50	TMEM138	MED18	UBAP2L	EXOSC6	IQGAP2	NDUFB11	TMEM143
				C1orf27	TMEM47	SURF6		OVCA2	CLSPN	MDP1	CCDC57	ZNF503	IK	MRPS17	DFNA5		ERMP1	TGOLN2	EXOSC6	C2orf81	HS6ST3	LOC101929469	TMEM134	AMY1A	MRPL10	FAM155B	NEMP2	RAPH1	CCDC57
				C14orf80	FGFR1OP	FAM214A		CCDC15	C6orf118	C7orf31	NCOA4	CCDC171	DSCR3	CCDC65	MAP10		GOLGA1	BATF2	COX7C	DYM	OSTM1	GON4L	C7orf25	GLT1D1	CCDC66	FAM161B	GFRA3	UBAP2L	CCDC158
				NUMA1	MEN1	CCDC171		GATAD2A	KANSL3	TMEM237	CLDN10	COBLL1	MTX3	CDT1	GTF2H5		CCDC142	HEATR5A	CCHCR1	MTMR6	MRPL50	VEZT	ICT1	PSMF1	CNST	FAM177A1	KIAA1467	PREB	GFRA3
					EVC2	ICE2		RIC1	C10orf32	ZSWIM1	SDCCAG8	TMEM143	MVK	ARMC6	NGFR		LMBR1L	UBR2	UQCR11	PELO	IBA57	GFRA3	AMN	METTL23	INSC	FAM228B	VHL	EXOC8	RPP25L
					EXOSC6	SZRD1		NOXRED1	CCDC158	RRP15	DOLK	CTAGE5	OTC	C9orf173	PPCS		ELP4	FBXO33	PMFBP1	EXOSC6	CTAGE5	CFAP53	GCC1	C1orf27		FAM92B	REV1	TMF1	CCDC66
					PMFBP1	TMEM237		LENG1	SYCP2	CBY1	MDP1	CCDC57	RINT1	MDC1	PCED1B		DNMT3A	ZSWIM1	DALRD3	C12orf66	TNRC6A	LHFP	SMKR1	DTWD2		FBF1	TMEM177	CEP290	MZT2A
					IBA57	AKAP9		MED17	NCOA4	SZRD1	IRF2BP2	PET117	OTUD6B	NDUFS5	GSE1		GRIPAP1	SYN2	TAB2	PEX16	AQP11	CEP152	SDHAF1	HDHD3		FNBP4	CCDC67	MRPS30	SAMD10
					ECSIT	MPHOSPH9		HEATR1	RPP30	SRRD	ARID2	NUPL1	SMDT1	MTX3	CACNG5		BEGAIN	NMT1	HAX1	NDUFA1	SPG11	CEP112	BNIP1	SNAPC1		FOPNL	MAP10	ACIN1	TRABD2B
					RUNDC3A			CCDC150	COMMD3	NDUFAF4	BRCA2	BUB1B	NDUFA1	NDUFA7	UBAP2L		APPL2	MTR	TEX43	TMF1	LHFP	C17orf97	TRMT2A	TMEM177		FSIP1	MIIP	CXorf56	SCG5
					KIAA1217			NAA35	APOOL	TMEM234	FAM214A	PRAMEF14	SMARCD1	TEX43	MUS81		TMEM145	LYSMD3	NDUFA1	TMEM214	NUPL1	MED1	TPST1	TRUB2		GDPGP1	ZSWIM1	FAM177A1	TCAF2
					LOC101929469			RB1CC1	MDP1	FBXO21	TMEM198	TGOLN2	PIGW	FAM129B	NPTX1		CFAP221		CCDC177	CCDC150	MRPL54	PCM1	NAA35	FOPNL		GEMIN6	KANSL3	RTN4IP1	POLR3D
					CHPF			ECSIT	HERPUD1	SHFM1	TTC7B	GTF3C2	NPRL3	MRPL37	GON4L		HTATSF1		BLOC1S4	AXIN2	CCDC158	NUP188	LENG1	NUDT19		GOLGA3	TOMM22	EFHD2	MED1
					BABAM1			SLC10A1	RPA3	GMNN	KIAA0430	MPHOSPH9	TLCD2	TBCA	CCDC142		COBLL1		UBAP1	TSNAXIP1	SSX2IP	SSX2IP	SETD4	PEX2		GON4L	CCDC138	IMMT	TMEM123
					OFD1			CCDC22	PSMG3	TMEM205	SLC35F3	TMEM214	LOC101928793	TIMM22	HPS5		ATF6B		TMEM47	UAP1	MRPL10	C1orf177	SPATA7	BIN3		GPATCH3	NDUFAF4	DOCK11	CLDN10
					COG7			CHMP7	C1orf106	CLDN10	MTUS2	C2CD2	VPS51	GYLTL1B	RYBP		GCSH		TMEM60	KIAA1257	PP2D1	CEP44	TPR	MNT		GPR180	KIAA0391	ZC4H2	SPATS1
					MDP1			RGS22	MRPL10	NUP188	DHH	MAP10	PPP4R3A	FSIP1	TMEM237		FITM2		INO80E	MYD88	OFD1	C8orf89	RPL30	TTI2		GRIPAP1	CCDC174	PATL1	FAM81A
					TMEM237			MRPS15		SAT1	NCAPG	MRPL35	FHAD1	RFT1	AMN		MTX3			C19orf70	MRPL48	BUB1B	PSPH	FGFR1OP		GSE1	MRM1	C1orf27	ASCC2
					KIAA2012			NDUFB10		PRAMEF14	C5orf42	PATL1	SPTSSA	CAMSAP3	INTS10		RFT1			NDUFB10	FSIP1	C12orf66	CHAF1A	TOR1AIP1		GTF3C1	UBXN11	CEP95	CCDC166
					TSHZ1			SNAPC3		NFIA	C20orf96	SDCCAG8	MTOR	MBD2	HBZ		NOXRED1			UQCRQ	TACO1	CLNS1A	HEATR9	TSEN34		GTF3C4	FSIP1	THUMPD3
					CCDC24			HSPBP1		ZNF839	C3orf20	PMFBP1	GPM6B	MZT2A	C5orf42		CNKSR3			RRBP1	KIAA1467	ZNF503	OFD1	NRSN1		IBA57	ESCO2	FGFR1OP
					C7orf72			PRAMEF14		OAZ1	PPP1R10	EVC2	CKAP5	SPAG8	STOX1		C1orf27			ATP5H	MRPL35	KIAA0825	NBR1	FAM76A		INSC	TMEM143
					PPP1R32			DEDD		C19orf70	C19orf70	NUMA1	VWA3B	RAB3GAP2	CRCP		LOC102724788			C1QBP	RASSF8	CCDC181	EXOSC3	AMN		INTS10	PET117
					MTUS2			CCDC18		FAM155B	PLIN2	NPTX1	ZRANB1	IFRD1	TMEM134		NGLY1			TPD52	CEP112	CCDC142	GPR155	CCDC62		IQCE	STK19
					BTBD7			LSM12		FBXO18	TMEM17	CACNG5	DRAM2	HEATR6	KANSL3		DEK			HSPB2	LRRIQ1	WRB	RTP4	SLC46A3		KIAA1257	CCDC17
					SLC10A2			UBIAD1		ICE2	CCDC171	SMIM15	DRC7	MAP10	FSIP1		EXD2			UQCR11	AKNA	NUDT19	TMEM128	CCDC34		KIAA1467	AVL9
					IQCE			TPR		SPAG8	TMEM123	RTP4	C4orf29	TAF7	KIAA1467		HEATR6			RTP4	SPATS1	NDUFB11	COX11	MGME1		KIAA1524
					INTS7			NCOA4		CCDC158	HENMT1	COX7C	NCLN	CACNA2D3	DEDD		KIAA2012			ZNF839	CEP44	F8A1	FIS1	SLC50A1		KNTC1
					EMC7			PDCD10		TMEM214	HMGXB4		C11orf65	TNRC6A	CLDN10		CEP295			PRR5	MTUS2	MRPS15	C6orf118	NPL		LAMTOR3
					C11orf88			AQP11		C1orf106	EVC2		PIH1D2	XRRA1	C8orf37		LOC100996634			TMEM184B	NCOA4	ZC3H18	RGS22	MTFR1		LAS1L
					CCDC174			MKRN2OS		GTF3C4	ZNHIT1		ASCC2	METTL25	KIAA0825		CEP95			DTHD1	EFCAB12	SUDS3	FAM210A	LOC101929469		LENG1
					TDP1			CSPG4		C10orf32	KIAA1407		ITPA	WDR87	SLC50A1		PPP1R10			FAM120A	MRPS27	MTX3	PFDN1	CYB561D2		LOC100996634
					ANKFN1			SDCCAG8		MED4	UBAP1		C9orf135	OFD1	MRPL50		TMEM143			FAM65B	BTBD7	TMEM256	PARL	PIGZ		LOC105375007
					STPG2			MED27		SH3BP5L	TWISTNB		ABI2	TMEM62	LAMTOR3		BUD31			RTTN	STX17	ZSWIM3	TTC23	CCDC64		LOC646730
					SUDS3			C9orf116		SUZ12	ASUN		EMC4		CLRN2		AMT			TSHZ1	MDP1	LYSMD2	TTI2	MKI67		LRMP
					MFSD3			CDT1		FAM134C	SLX1A		IQCH		RPP30		CCDC177			MCOLN2	SRRM2	CCDC169	OSTM1	CCDC57		LRRIQ1
					CCDC33			CCDC105		TNRC6A	SHFM1		NDUFAF2		MTUS2		SMPD3				FBXO25	KXD1	ZNF598	GPATCH4		LSM11
					CCDC17			ARMC2		FAM65B	MOSPD1		RAB11FIP3		PET117		RAB3IP				DTWD1		EXOSC6	TMEM143		LTV1
					CLDN10			HAX1		C2orf73	FSIP1		NANOS1		TCTN1		FAM98A				GCC1		AP5M1	CUEDC1		LYRM4
					CCDC169			SHFM1		EBF2	ACRC		PPP6R1		ECSIT		ZC2HC1A				CCDC34		ZNF385D	AQP11		LYRM7
					NOS1AP			MAP10		PPP1R36	MAP10		ARFGAP2		CREBL2		PROM1				EVC2		KIAA1467	SLC35F3		LYSMD2
					SPATS1			KIAA1919		FAM227A	WARS2		LOC101929469		COA1		CTNND2				CCDC17		TMEM143	C2CD2		MAP10
					DTHD1			CCDC17		WAPAL	CCDC169		MRPL19		TMEM9B		CEP135				CLDN10		CLNS1A	GPR180		MED14
					SH2D5			CCDC57		ASCC2	BRE		POLR2H		SFI1		CPSF6				LOC101929469		PPHLN1	C17orf53		MED17
					AQP11			LOC102723897		AQP11	CMC1				CIPC		RTP4				CFAP36		MYD88	MIIP		MED18
					AKIRIN1			TMEM177		MKRN2OS	SNRNP27				MRPL10		TMEM237				CCDC166		DCTN3	CHAF1A		MED26
					TAB2			OAZ1		CTTNBP2NL	FGFR1OP2				NUDT19		CCDC67				NDUFB10		PRKRA	FSIP1		MEIOB
					DZIP1L			C9orf78		CCDC17	TANGO6				C3orf67		TMEM214				PMFBP1		CCDC142	MAP10		MKL1
					MAOA			C7orf31		UBLCP1	CFAP36						ZCCHC7				CCDC57		GOLGA3	NPRL3		MPHOSPH9
					CCDC178			STK11IP		DGCR6L	RGS22						EMC4				C7orf31		AQP11	FBXO47		MRGBP
					TTI1			TTC24		C17orf97	TDP1						EXOC8				SYCP2		CCDC178	HHAT		MRPL10
					SMOC2			FBXO4		MRPL10	TMUB2						NCOA4				CCDC112		CEP44	NUPL1		MRPL35
					CDR2L			NDUFAF5		MRPS15	TPGS1						SPARC				C10orf67		C7orf26	FAM155B		MRPL37
					MRPS27			CFAP36		C7orf72	KRI1						LOC102723897				MAP10		RNF25	CCDC42B		MRPL40
					FAM227A			ZMAT1		TEX43	NEMP2						KIAA1919				GON4L		GPRIN1	CFAP53		MRPL50
					DCTN3			CHPF		C2CD3	INO80C						CHPF				FREM1		HYLS1	C7orf72		MRPL52
					FAM228B			FAM126A		DTHD1	PRAMEF14						C12orf66				MED18		FAM126A	RMI1		MRPS15
					CCDC166			GTF3C1		OFD1	STPG1						RB1CC1				GDPD1		EFCAB12	SLC18B1		MRPS18B
					LOC102724828			C1orf87		SMOC2	FAM155B						NAIP				CCDC142			EOGT		MRPS27
					NOC4L			HYLS1		ZSWIM5	AQP11						GOLGA2				INSC			CNBD1		MYCBPAP
					RRNAD1			KIAA2012		C16orf58	C1orf87						SH3BGRL2				C10orf53			NUDT17		MYD88
					NDUFB10			CCDC169		TMEM198	CCDC18						BAK1				TMEM254			MPHOSPH9		N6AMT1
					TMCO3			CCDC34		GGNBP2	LAS1L						SRF				IRF2			CCDC22		NASP
								CCDC64		CREBRF	ARL14EP										NOP9			TEX15		NCOA4
								MRPL47		RAB3IP	PP2D1										TWISTNB			RB1CC1		NDUFA1
								PSMG1		CCDC83	OAZ1													C1orf87		NDUFAF4
								CRCP		KPTN	C20orf27													FAM228B		NELFB
								RASSF8																CEP89		NEMP2
								RTTN																C10orf67		NHLH1
								C1orf27																MFSD3		NOC2L
								C12orf49																INSC		NUDT19
								KIAA1467																SASH3		OAZ1
								FSIP1																SAAL1		OFD1
								OFD1																RNF32		PCM1
								POLA2																TSNAXIP1		PLIN2
								MED22																ALMS1		POLR3C
								MRPS18B																AKNA		PPHLN1
								C17orf97																TRERF1		PPP1R21
								TCEANC2																DTHD1		PRR5
								SNX14																LCA5		PRUNE
								AP5Z1																CCDC157		PSMG3
								GRIPAP1																CCDC66		RANGAP1
								HEXDC																TELO2		RB1CC1
								B3GNTL1																FAM151B		REC8
								CDC6																ANAPC5		RGS22
								CCDC142																EVC2		RICTOR
								GLT1D1																PRUNE		RMI1
								NUP214																MTTP		RNLS
								NDEL1																CEP152		RPAIN
								AMMECR1																TNRC6A		RPRD2
																								GOLGA4		RTTN
																								HEATR6		SAMD10
																								FAM149B1		SASH1
																								RGS22		SDCCAG8
																								MMS19		SDHD
																								MDC1		SENP8
																								FBF1		SFI1
																								URB1		SH3BP5L
																								CCP110		SHFM1
																								CCDC142		SLC22A18
																								LRMP		SLC48A1
																								KIAA2012		SLC50A1
																								STPG1		SMCR8
																								TDRD12		SMG9
																								CEP295		SNAPC1
																								LRRIQ1		SPAG8
																								GTF3C1		SPATA7
																								CCDC158		STPG1
																								PRDM8		STX17
																								LOC105375007		STYXL1
																								TMEM134		SURF6
																								ZCWPW1		SZT2
																								TMCO3		THAP9
																										TMEM143
																										TMEM17
																										TMEM170B
																										TMEM199
																										TMEM237
																										TMEM47
																										TMEM56
																										TMEM69
																										TNRC6A
																										TPGS1
																										TPX2
																										TTI2
																										TWISTNB
																										UBAP1
																										WDR93
																										XRRA1
																										ZC3H18
																										ZNF503
																										ZNHIT2
