# Supplementary material for: Increased taxon sampling reveals thousands of hidden orthologs in flatworms
Source: HighWire-hosted journal article supplement (doi:10.1101/gr.216226.116), 2017-04-11
Supplement: Supplemental_Table_3.xlsx [file Supplemental_Table_3.xlsx]

## Sheet: Sheet1
	Human gene	Bridge gene	Target gene
Bdelloura candida
	STAG1	comp233686_c0_seq1	c14326_g1_i1
	STAG3	comp233686_c0_seq1	c14326_g1_i1
Bothriomolus balticus
	SLC8A3	comp262327_c0_seq4	c10295_g1_i1
	SLC8A1	comp262327_c0_seq4	c10295_g1_i1
	SLC8A2	comp262327_c0_seq9	c10295_g1_i1
	EHD2	comp262249_c0_seq2	c2548_g1_i1
	EHD4	comp262249_c0_seq2	c2548_g1_i1
	EHD3	comp262249_c0_seq2	c2548_g1_i1
	EHD1	comp262249_c0_seq2	c2548_g1_i1
Dendrocoelum lacteum
	AMY1C	comp266083_c0_seq2	comp401048_c0_seq4
	AMY1A	comp266083_c0_seq2	comp401048_c0_seq4
	AMY2B	comp266083_c0_seq2	comp401048_c0_seq4
	AMY2A	comp266083_c0_seq2	comp401048_c0_seq4
	AMY1B	comp266083_c0_seq2	comp401048_c0_seq4
Fascioloides magna
	F8A3	comp296778_c0_seq1	comp27958_c0_seq1
	F8A2	comp296778_c0_seq1	comp27958_c0_seq1
	F8A1	comp296778_c0_seq1	comp27958_c0_seq1
Geocentrophora applanata
	LOC400736	comp119458_c0_seq1	comp117794_c0_seq1
	PRAMEF14	comp119458_c0_seq1	comp117794_c0_seq1
	PRAMEF2	comp119458_c0_seq1	comp117794_c0_seq1
Gnosonesimida sp. IV
	LOC400736	comp119458_c0_seq1	comp133417_c0_seq2
	PRAMEF14	comp119458_c0_seq1	comp133417_c0_seq2
	PRAMEF2	comp119458_c0_seq1	comp133417_c0_seq2
Kronborgia cf. amphipodicola
	F8A3	comp296778_c0_seq1	comp86360_c0_seq1
	F8A2	comp296778_c0_seq1	comp86360_c0_seq1
	F8A1	comp296778_c0_seq1	comp86360_c0_seq1
Lehardyia sp.
	VPS13C	comp274408_c0_seq78	c35_g1_i1
	VPS13A	comp274408_c0_seq24	c35_g1_i1
Lepidodermella squamata
	PRAMEF14	comp119458_c0_seq1	comp385520_c0_seq2
	LOC400736	comp119458_c0_seq1	comp385520_c0_seq2
	PRAMEF2	comp119458_c0_seq1	comp385520_c0_seq2
	F8A2	comp296778_c0_seq1	comp378147_c0_seq1
	F8A3	comp296778_c0_seq1	comp378147_c0_seq1
	F8A1	comp296778_c0_seq1	comp378147_c0_seq1
Microdalyellia sp.
	PLXNA1	comp267800_c0_seq1	c619_g2_i1
	PLXNA4	comp267800_c0_seq1	c619_g2_i1
Microstomum lineare
	PRAMEF14	comp119458_c0_seq1	comp101949_c0_seq1
	PRAMEF2	comp119458_c0_seq1	comp101949_c0_seq1
Monocelis fusca
	LOC400736	comp119458_c0_seq1	comp189455_c0_seq1
	PRAMEF14	comp119458_c0_seq1	comp189455_c0_seq1
	PRAMEF2	comp119458_c0_seq1	comp189455_c0_seq1
Prorhynchus alpinus
	LOC400736	comp119458_c0_seq1	comp89897_c0_seq1
	PRAMEF14	comp119458_c0_seq1	comp89897_c0_seq1
	PRAMEF2	comp119458_c0_seq1	comp89897_c0_seq1
	SLX1B	comp302827_c0_seq1	comp67512_c0_seq1
	SLX1A	comp302827_c0_seq1	comp67512_c0_seq1
Prorhynchus sp. I
	LOC400736	comp119458_c0_seq1	comp163587_c0_seq1
	PRAMEF14	comp119458_c0_seq1	comp163587_c0_seq1
	PRAMEF2	comp119458_c0_seq1	comp163587_c0_seq1
	EBF2	comp261319_c0_seq4	comp367594_c0_seq1
	EBF4	comp261319_c0_seq4	comp367594_c0_seq1
	EBF3	comp261319_c0_seq1	comp367594_c0_seq1
Prosogynopora riseri
	DIP2C	comp264500_c0_seq9	c1107_g2_i1
	DIP2A	comp264500_c0_seq9	c1107_g2_i1
	NMT1	comp104075_c0_seq2	c9423_g1_i2
	NMT2	comp104075_c0_seq2	c9423_g1_i2
	HEATR5A	comp261601_c0_seq1	c8371_g6_i3
	HEATR5B	comp261601_c0_seq1	c8371_g6_i3
	CCDC88A	comp272565_c0_seq49	c10300_g1_i1
	CCDC88C	comp272565_c0_seq45	c10300_g1_i1
Schistosoma mansoni
	F8A3	comp296778_c0_seq1	SmlC26d05.q1k
	F8A2	comp296778_c0_seq1	SmlC26d05.q1k
	F8A1	comp296778_c0_seq1	SmlC26d05.q1k
	DOCK11	comp261522_c0_seq22	sm_r28-48c07.q1k
	DOCK8	comp261522_c0_seq1	sm_r28-48c07.q1k
Solenopharyngidae sp.
	AKAP13	comp267200_c0_seq7	c10676_g1_i1
	ARHGEF2	comp267200_c0_seq13	c10676_g1_i1
	F8A2	comp296778_c0_seq1	c11915_g1_i1
	F8A3	comp296778_c0_seq1	c11915_g1_i1
	F8A1	comp296778_c0_seq1	c11915_g1_i1
Stenostomum leucops
	PRAMEF14	comp119458_c0_seq1	comp54226_c0_seq1
	LOC400736	comp119458_c0_seq1	comp54226_c0_seq1
	PRAMEF2	comp119458_c0_seq1	comp54226_c0_seq1
Stylochus ellipticus
	PRAMEF14	comp119458_c0_seq1	comp150672_c0_seq1
	LOC400736	comp119458_c0_seq1	comp150672_c0_seq1
	PRAMEF2	comp119458_c0_seq1	comp150672_c0_seq1
Xenoprorhynchus sp. I
	MED12L	comp107355_c0_seq1	comp30457_c0_seq1
	MED12	comp107355_c0_seq1	comp30457_c0_seq1
	LOC400736	comp119458_c0_seq1	comp45793_c0_seq1
	PRAMEF14	comp119458_c0_seq1	comp45793_c0_seq1
	PRAMEF2	comp119458_c0_seq1	comp45793_c0_seq1
