# Supplementary material for: Increased taxon sampling reveals thousands of hidden orthologs in flatworms
Source: HighWire-hosted journal article supplement (doi:10.1101/gr.216226.116), 2017-04-11
Supplement: Supplemental_Table_4.xlsx [file Supplemental_Table_4.xlsx]

## Sheet: Sheet1
Human Gene	PFAM content		P. vittatus ortholog	PFAM content
SAMD10	PF07647		comp103403_c0_seq1	PF07647
SURF6	PF04935		comp103883_c0_seq1	PF04935
EXOSC6	PF01138		comp103952_c0_seq1	PF01138
C8orf33	PF15393		comp104007_c0_seq1	PF15393		PFAM domains present in H. sapiens and not in the P. vittatus ortholog
C1QBP	PF02330		comp104280_c0_seq1	PF02330		PFAM domains present inP. vittatus and not in the H. sapiens ortholog
C19orf70	PF15884		comp104395_c0_seq1	PF15884
LYRM7	PF05347		comp104857_c0_seq1	PF05347
AUP1	PF02845		comp105411_c0_seq2	PF02845
SENP8	PF02902		comp106454_c0_seq1	PF02902
TTI2	PF10521		comp106619_c0_seq1	PF10521
REC8	PF04825		comp109501_c0_seq1	PF04825
MRPL50	PF10501		comp120199_c0_seq1	PF10501
GTF3C4	PF12657		comp184981_c0_seq1	PF12657
	PF12660			PF12660
NCOA4	PF12489		comp186351_c0_seq1	PF12489
DEK	PF08766		comp188543_c0_seq1	PF08766
CCDC177	PF15558		comp189831_c0_seq1	PF15558
TPX2	PF06886		comp189904_c0_seq2	PF06886
	PF09041			PF12214
	PF12214
MRPS27	PF10037		comp190021_c0_seq1	PF10037
STYXL1	PF00581		comp190238_c0_seq1	PF00581
				PF00782
MRPS15	PF00312		comp190269_c0_seq1	PF00312
ADRM1	PF04683		comp192112_c0_seq1	PF04683
ADRM1	PF16550		comp192112_c0_seq1	PF16550
STPG1	PF07004		comp193208_c0_seq1	PF07004
LYSMD2	PF01476		comp199765_c0_seq1	PF01476
MAP10	PF14924		comp201881_c0_seq1	PF14924
	PF14925
RANGAP1	PF07834		comp229777_c0_seq1	PF13516
	PF13516
SLC22A18	PF07690		comp229963_c0_seq2	PF07690
CCDC66	PF15236		comp230421_c0_seq1	PF15236
SLC50A1	PF03083		comp231020_c0_seq1	PF03083
MRGBP	PF07904		comp233660_c0_seq1	PF07904
KNTC1	PF10493		comp234134_c0_seq1	PF10493
TMEM199	PF11712		comp234829_c0_seq1	PF11712
NEMP2	PF10225		comp235606_c0_seq1	PF10225
RNLS	PF01593		comp236017_c0_seq2	PF01593
				PF13450
C14orf80	PF14970		comp236126_c0_seq1	PF14970
	PF14971
C7orf31	PF15093		comp237421_c0_seq2	PF15093
FNBP4	PF00397		comp238588_c1_seq1	PF00397
SPATA7	PF15244		comp239116_c0_seq3	PF15244
AQP11	PF00230		comp241116_c0_seq2	PF00230
CTTNBP2NL	PF09727		comp246412_c0_seq3	PF09727
COA1	PF08695		comp246555_c1_seq2	PF08695
C6orf118	PF15739		comp247045_c0_seq1	PF15739
CCDC174	PF13300		comp247124_c0_seq1	PF13300
ERCC1	PF00633		comp247240_c0_seq1	PF03834
	PF03834			PF12826
TMEM170B	PF10190		comp247629_c0_seq1	PF10190
ZNHIT2	PF04438		comp248155_c0_seq1	PF04438
NDUFAF4	PF06784		comp248770_c0_seq2	PF06784
TMEM143	PF12576		comp251205_c0_seq1	PF12576
MRPL35	PF01632		comp251365_c0_seq1	PF01632
FAM161B	PF10595		comp251402_c0_seq1	PF10595
TMEM237	PF15383		comp252734_c0_seq1	PF15383
MYD88	PF00531		comp253270_c0_seq1	PF00531
	PF01582			PF13676
ACRC	PF10263		comp253703_c0_seq1	PF10263
AP5M1	PF00928		comp253916_c0_seq2	PF00928
ALKBH6	PF13532		comp255299_c0_seq1	PF13532
RPRD2	PF04818		comp255559_c0_seq2	PF04818
	PF16566			PF16566
DPH6	PF01902		comp256266_c0_seq1	PF01042
				PF01902
C10orf67	PF15852		comp256620_c0_seq1	PF15821
RGS22	PF00615		comp257596_c0_seq2	PF00615
NELFB	PF06209		comp258129_c0_seq1	PF06209
NOC2L	PF03715		comp258491_c0_seq1	PF03715
FAM177A1	PF14774		comp258922_c0_seq2	PF14774
GPR180	PF10192		comp258929_c0_seq1	PF10192
MED26	PF08711		comp259025_c0_seq2	PF08711
	PF15693
	PF15694
RB1CC1	PF10377		comp259075_c0_seq2	PF10377
EOGT	PF04577		comp259200_c0_seq1	PF04577
SH3BP5L	PF05276		comp259915_c0_seq1	PF05276
MED18	PF09637		comp260015_c0_seq1	PF09637
PPP1R21	PF10205		comp261025_c0_seq1	PF10205
	PF10212			PF10212
CFAP54	PF14858		comp261906_c0_seq1	PF14858
BTBD17	PF00651		comp261967_c0_seq1	PF00651
	PF07707			PF07707
CCDC34	PF13904		comp262091_c0_seq2	PF13904
CLDN10	PF00822		comp263787_c0_seq2	PF00822
MKL1	PF02037		comp264289_c0_seq1	PF02755
	PF02755
IQCE	PF00612		comp265794_c0_seq2	PF00612
LTV1	PF04180		comp265879_c0_seq1	PF04180
MYCBPAP	PF14646		comp265959_c0_seq1	PF14646
RMI1	PF08585		comp266254_c0_seq1	PF08585
RMI1	PF16099		comp266254_c0_seq1	PF16099
BNIP1	PF03908		comp266275_c0_seq1	PF03908
PRUNE	PF01368		comp266948_c0_seq2	PF01368
PRUNE	PF02833		comp266948_c0_seq2	PF02833
TNRC6A	PF10427		comp267132_c0_seq2	PF16608
	PF16608
MED14	PF08638		comp268666_c0_seq2	PF08638
ASPDH	PF01958		comp268971_c0_seq2	PF01958
				PF03447
RICTOR	PF14663		comp269042_c0_seq3	PF14663
	PF14664			PF14664
	PF14665			PF14666
	PF14666			PF14668
	PF14668
LENG1	PF10197		comp269131_c1_seq3	PF10197
PPHLN1	PF11488		comp269365_c1_seq13	PF11488
LRRIQ1	PF00612		comp270182_c0_seq1	PF13516
				PF13855
SNAPC1	PF09808		comp270257_c0_seq1	PF09808
KIAA1257	PF15084		comp270579_c0_seq2	PF15084
LAS1L	PF04031		comp270749_c1_seq2	PF04031
LRMP	PF05781		comp271063_c0_seq3	PF05781
CCDC158	PF15921		comp271221_c0_seq5	PF15921
NHLH1	PF00010		comp271636_c0_seq2	PF00010
POLR3C	PF05645		comp271725_c0_seq1	PF05645
	PF08221			PF08221
SDCCAG8	PF15964		comp272266_c0_seq1	PF15964
RTTN	PF14726		comp272449_c0_seq2	PF14726
EVC2	PF12297		comp272949_c1_seq3	PF12297
CCDC142	PF14923		comp273070_c2_seq2	PF14923
LAMTOR3	PF08923		comp273462_c0_seq1	PF08923
FSIP1	PF15554		comp273606_c0_seq2	PF15554
THAP9	PF05485		comp273842_c1_seq1	PF12017
	PF12017
TMEM17	PF09799		comp273884_c2_seq1	PF09799
PCM1	PF15717		comp274166_c0_seq14	PF15717
INSC	PF16748		comp274184_c0_seq4	PF16748
PRR5	PF08539		comp275589_c0_seq1	PF08539
BATF2	PF00170		comp275805_c1_seq1	PF07716
ATP5I	PF05680		comp279203_c0_seq1	PF05680
NASP	PF10516		comp280756_c0_seq1	PF10516
SDHD	PF05328		comp282586_c0_seq1	PF05328
APOOL	PF09769		comp282964_c0_seq1	PF09769
CFAP53	PF13868		comp284472_c0_seq1	PF13868
DNTTIP2	PF08698		comp284552_c0_seq1	PF08698
FAM92B	PF06730		comp284801_c0_seq1	PF06730
TWISTNB	PF03876		comp285406_c0_seq1	PF03876
CRCP	PF03874		comp285831_c0_seq1	PF03874
CCDC166	PF14988		comp286410_c0_seq1	PF14988
PSMG3	PF10178		comp289256_c0_seq1	PF10178
CHAF1A	PF11600		comp290089_c0_seq1	PF12253
	PF12253
	PF15539
	PF15557
MRPL37	PF07147		comp291961_c0_seq1	PF07147
OFD1	PF16045		comp296260_c0_seq1	PF16045
CHPF	PF05679		comp296989_c0_seq1	PF05679
GEMIN6	PF06372		comp299978_c0_seq1	PF06372
DGCR6L	PF07324		comp300076_c0_seq1	PF07324
N6AMT1	PF05175		comp301580_c0_seq1	PF05175
C5orf45	PF15749		comp324858_c0_seq1	PF15749
