# Supplementary material for: Increased taxon sampling reveals thousands of hidden orthologs in flatworms
Source: HighWire-hosted journal article supplement (doi:10.1101/gr.216226.116), 2017-04-11
Supplement: Supplemental_Table_5.xlsx [file Supplemental_Table_5.xlsx]

## Sheet: Sheet1
	M. lineare	M. lignano	P. vittatus	S. ellipticus	G. applanata	Prorhynchus sp. I	Gnosonesimida sp. IV	R. rostratum	M. fusca	K. cf. amphipodicola	D. lacteum	S. mediterranea	B. semperi	F. magna	TOTAL(1)	Redundancy
Microstomum lineare	n/a	27	70	69	42	40	36	31	41	25	9	24	58	30	270	1.7037
Macrostomum lignano	51	n/a	75	71	30	36	42	37	23	20	18	34	44	30	219	2.19635
Prostheceraeus vittatus	30	23	n/a	0	42	27	31	30	44	14	5	20	44	16	181	1.56906
Stylochus ellipticus	28	20	54	n/a	32	24	0	18	31	11	4	25	34	12	181	1.44199
Geocentrophora applanata	47	14	83	85	n/a	49	47	32	36	23	17	31	58	26	280	1.95714
Prorhynchus sp. I	65	59	133	134	141	n/a	67	51	70	24	16	53	84	32	421	2.20665
Gnosonesimida sp. IV	59	46	94	95	63	44	n/a	47	85	30	9	43	72	38	295	2.24407
Rhynchomesostoma rostratum	77	65	114	118	81	62	82	n/a	118	45	25	66	112	50	402	2.32338
Monocelis fusca	47	13	83	80	38	35	44	38	n/a	22	13	34	59	28	273	1.81685
Kronborgia cf. amphipodicola	60	56	103	106	73	59	85	63	91	n/a	24	88	96	58	387	2.29716
Dendrocoelum lacteum	117	110	179	168	137	106	128	94	166	104	n/a	232	164	96	624	2.88622
Schmidtea mediterranea(2)	43	42	75	88	45	44	65	32	72	42	8	n/a	77	32	276	2.24638
Bothrioplana semperi	42	41	92	92	54	36	54	30	56	25	19	57	n/a	39	290	2.19655
Fascioloides magna	44	53	85	98	71	51	81	48	78	35	22	69	107	n/a	336	2.50595
TOTAL	710	569	1240	1204	849	613	762	551	911	420	189	776	1009	487	4216	2.11368
(1) Non-redundant hidden orthologs
(2) Numbers based on the S. mediterranea transcriptome published by Rink's lab in Dresden
