# Supplementary material for: Increased taxon sampling reveals thousands of hidden orthologs in flatworms
Source: HighWire-hosted journal article supplement (doi:10.1101/gr.216226.116), 2017-04-11
Supplement: Supplemental_Table_6.xlsx [file Supplemental_Table_6.xlsx]

## Sheet: Sheet1
Seqs	Bases	Length	GC	CEGs	Hidden orthologs	Branch	Clade	Species
31529	12897815	409.08	0.48	0.38	63	0.3489306313	Gnathostomulida	'Austrognathia'
41446	22365603	539.63	0.33	0.40	124	0.710228371	Platyhelminthes	'Bdelloura'
24201	11257706	465.18	0.40	0.44	102	0.4872977397	Platyhelminthes	'Bothriomolus'
96364	56081914	581.98	0.49	0.92	92	0.4780311769	Platyhelminthes	'Bothrioplana'
236761	115254878	486.80	0.35	0.86	179	0.699502728	Platyhelminthes	'Dendrocoelum'
42206	33048065	783.02	0.46	0.93	85	0.6590833983	Platyhelminthes	'Fascioloides'
121633	84830526	697.43	0.35	0.98	83	0.4974060795	Platyhelminthes	'Geocentrophora'
22363	28510283	1274	0.38	NA	71	NA	Platyhelminthes	Girardia'
71923	49489839	688.09	0.44	0.92	94	0.5930950896	Platyhelminthes	'Gnosonesimida'
76654	51328359	669.61	0.38	0.95	103	0.7729197194	Platyhelminthes	'Kronborgia'
18548	9340372	503.58	0.41	0.34	110	0.6698160561	Platyhelminthes	'Lehardyia'
5095	1846131	362.34	0.46	0.16	21	0.3841940764	Rotifera	'Lepadella'
65976	61247222	928.33	0.45	0.97	35	0.4906017147	Gastrotricha	'Lepidodermella'
81729	32818396	401.55	0.52	0.60	129	0.4590491037	Platyhelminthes	'Macrostomum'
175389	146421223	834	0.48	0.98	75	NA	Platyhelminthes	'MacrostomumL'
160713	104592789	650.80	0.40	0.96	70	0.3984201091	Platyhelminthes	'Microstomum'
136329	107319077	787.21	0.39	0.96	83	0.4850319564	Platyhelminthes	'Monocelis'
68584	33251738	484.83	0.40	0.81	133	0.5700023383	Platyhelminthes	'Prorhynchus'
69871	35939907	514.38	0.37	0.88	133	0.5370046765	Platyhelminthes	'Prorhynchus'
22380	11833063	528.73	0.43	0.35	77	0.4743133281	Platyhelminthes	'Prosogynopora'
50049	26049265	520.48	0.40	0.74	131	0.6458885425	Platyhelminthes	'Protomonotresidae'
6485	3673073	566.40	0.36	0.08	41	0.6962057677	Platyhelminthes	'Provortex'
103130	54514686	528.60	0.39	0.86	114	0.5768908807	Platyhelminthes	'Rhynchomesostoma'
54143	37838721	692.06	0.38	0.53	87	0.6604232268	Platyhelminthes	'Schistosoma'
28926	31092796	1051.62	0.36	0.88	107	0.6863078722	Platyhelminthes	'Schmidtea_mu'
27404	15247204	556.39	0.42	0.38	129	0.7539516758	Platyhelminthes	'Solenopharyngidae'
77832	79082476	1016.07	0.49	0.24	45	0.4906017147	Platyhelminthes	'Stenostomum'
148137	129598829	874.86	0.49	0.99	54	0.4600802806	Platyhelminthes	'Stylochus'
45785	20991891	458.49	0.38	0.66	156	0.5279275136	Platyhelminthes	'Xenoprorhynchus'
24836	15908586	640.55	0.33	NA	100	0.570	Platyhelminthes	'Microdalyella'
10093	14805351	1466	0.44	NA	56	0.785	Platyhelminthes	'Hymenolepsis'
