# Supplementary material for: Increased taxon sampling reveals thousands of hidden orthologs in flatworms
Source: HighWire-hosted journal article supplement (doi:10.1101/gr.216226.116), 2017-04-11
Supplement: Supplemental_Table_7.xlsx [file Supplemental_Table_7.xlsx]

## Sheet: cmp_lens.xls
Species	Number hidden genes	Cumulative length hidden genes	Average length hidden genes	Number non-hidden genes	Cumulative length non-hidden genes	Average length non-hidden genes
Austrognathia sp.	63	24731	392.556	31466	12873084	409.111
Bdelloura candida	124	77286	623.274	41322	22288317	539.381
Bothriomolus balticus	102	44237	433.696	24099	11213469	465.308
Bothrioplana semperi	92	56275	611.685	96272	56025639	581.952
Dendrocoelum lacteum	179	166539	930.385	236582	115088339	486.463
Fascioloides magna	85	95236	1120.42	42121	32952829	782.337
Geocentrophora applanata	83	110292	1328.82	121550	84720234	696.999
Girardia tigrina	71	106669	1502.38	22292	28403614	1274.16
Gnosonesimida sp. IV	94	107008	1138.38	71829	49382831	687.505
Hymenolepis microstoma	56	72567	1295.84	10037	14732784	1467.85
Kronborgia cf. amphipodicola	103	101389	984.359	76551	51226970	669.187
Lehardyia sp.	110	53542	486.745	18438	9286830	503.679
Lepadella patella	21	5619	267.571	5074	1840512	362.734
Lepidodermella squamata	35	50933	1643	65945	61196289	927.99
Macrostomum cf. ruebushi	129	48189	373.558	81600	32770207	401.596
Macrostomum lignano	75	115828	1544.37	175314	146305395	834.533
Microdalyellia sp.	100	64733	647.33	24736	15843853	640.518
Microstomum lineare	70	65709	938.7	160643	104527080	650.679
Monocelis fusca	83	62186	749.229	136246	107256891	787.23
Prorhynchus alpinus	133	72556	545.534	68451	33179182	484.714
Prorhynchus sp. I	133	71427	537.045	69738	35868480	514.332
Prosogynopora riseri	77	34707	450.74	22303	11798356	529.003
Protomonotresidae sp.	131	68286	521.267	49918	25980979	520.473
Provortex cf sphagnorum	41	28894	704.732	6444	3644179	565.515
Rhynchomesostoma rostratum	114	65860	577.719	103016	54448826	528.547
Schistosoma mansoni	87	72950	838.506	54056	37765771	698.642
Schmidtea mediterranea	87	124781	1434.26	143254	120517665	841.287
Schmidtea mediterranea (be)	90	94087	1045.41	25664	26164000	1019.48
Schmidtea mediterranea (dd)	75	110406	1472.08	38558	51680980	1340.34
Schmidtea mediterranea (mu)	107	125821	1175.9	28819	30966975	1074.53
Schmidtea mediterranea (ox)	84	95906	1141.74	55865	59890889	1072.06
Schmidtea mediterranea (to)	78	112937	1447.91	24465	30333602	1239.88
Schmidtea mediterranea (uc)	84	95906	1141.74	55865	59890889	1072.06
Solenopharyngidae sp.	129	79564	616.775	27275	15167640	556.1
Stenostomum leucops	45	79677	1770.6	77787	79002799	1015.63
Stylochus ellipticus	54	67955	1258.43	148083	129530874	874.718
Xenoprorhynchus sp. I	156	64762	415.141	45629	20927129	458.637
		Total average	921.833		Total average	745.275
		Standard deviation	422.109		Standard deviation	290.636
		Variance	178176		Variance	84469.1
			Mann-Whitney U test	p-value 0.1141 (not significant)
