# Supplementary material for: Increased taxon sampling reveals thousands of hidden orthologs in flatworms
Source: HighWire-hosted journal article supplement (doi:10.1101/gr.216226.116), 2017-04-11
Supplement: Supplemental_Table_8.xlsx [file Supplemental_Table_8.xlsx]

## Sheet: Hoja1
Domain	Counts
PF00169	11
PF01833	6
PF00240	5
PF00612	5
PF07690	5
PF12874	5
PF12937	5
PF00350	4
PF00498	4
PF00536	4
PF00615	4
PF01593	4
PF02845	4
PF07647	4
PF12624	4
PF12763	4
PF16880	4
PF00098	3
PF00128	3
PF00134	3
PF00168	3
PF00291	3
PF00514	3
PF00515	3
PF00531	3
PF00787	3
PF00788	3
PF00789	3
PF00855	3
PF01138	3
PF01465	3
PF01585	3
PF01699	3
PF01753	3
PF02037	3
PF02806	3
PF03160	3
PF04438	3
PF04818	3
PF04893	3
PF05347	3
PF07716	3
PF08190	3
PF08700	3
PF08711	3
PF09333	3
PF10197	3
PF13424	3
PF13499	3
PF16422	3
PF16423	3
PF16494	3
PF00010	2
PF00018	2
PF00041	2
PF00042	2
PF00059	2
PF00076	2
PF00145	2
PF00170	2
PF00293	2
PF00397	2
PF00400	2
PF00452	2
PF00501	2
PF00534	2
PF00567	2
PF00621	2
PF00633	2
PF00635	2
PF00640	2
PF00641	2
PF00646	2
PF00653	2
PF00822	2
PF00856	2
PF01170	2
PF01233	2
PF01248	2
PF01347	2
PF01403	2
PF01412	2
PF01426	2
PF01437	2
PF01459	2
PF01476	2
PF01490	2
PF01553	2
PF01758	2
PF02014	2
PF02174	2
PF02194	2
PF02257	2
PF02338	2
PF02466	2
PF02535	2
PF02799	2
PF03009	2
PF03062	2
PF03188	2
PF03357	2
PF03372	2
PF03568	2
PF03725	2
PF03798	2
PF03828	2
PF03876	2
PF03914	2
PF03942	2
PF04042	2
PF04389	2
PF04434	2
PF04437	2
PF04969	2
PF05485	2
PF05622	2
PF05699	2
PF06464	2
PF06650	2
PF06920	2
PF07004	2
PF07147	2
PF07258	2
PF07707	2
PF07719	2
PF07773	2
PF08238	2
PF08313	2
PF08337	2
PF08514	2
PF08628	2
PF09079	2
PF09457	2
PF09497	2
PF09790	2
PF10192	2
PF10242	2
PF10591	2
PF11566	2
PF11878	2
PF12144	2
PF12145	2
PF12348	2
PF12485	2
PF12901	2
PF13041	2
PF13414	2
PF13639	2
PF13679	2
PF13768	2
PF13812	2
PF13868	2
PF13893	2
PF14429	2
PF14821	2
PF14922	2
PF15309	2
PF15739	2
PF16184	2
PF16566	2
PF16652	2
PF16908	2
PF16909	2
PF16910	2
PF00004	1
PF00011	1
PF00017	1
PF00020	1
PF00032	1
PF00035	1
PF00045	1
PF00050	1
PF00054	1
PF00068	1
PF00069	1
PF00086	1
PF00090	1
PF00094	1
PF00095	1
PF00097	1
PF00107	1
PF00118	1
PF00149	1
PF00173	1
PF00177	1
PF00185	1
PF00211	1
PF00230	1
PF00237	1
PF00252	1
PF00270	1
PF00276	1
PF00288	1
PF00307	1
PF00312	1
PF00313	1
PF00319	1
PF00320	1
PF00327	1
PF00335	1
PF00338	1
PF00348	1
PF00354	1
PF00366	1
PF00370	1
PF00373	1
PF00378	1
PF00383	1
PF00403	1
PF00406	1
PF00413	1
PF00415	1
PF00418	1
PF00454	1
PF00466	1
PF00467	1
PF00468	1
PF00472	1
PF00505	1
PF00520	1
PF00533	1
PF00535	1
PF00557	1
PF00561	1
PF00564	1
PF00569	1
PF00579	1
PF00580	1
PF00581	1
PF00583	1
PF00588	1
PF00595	1
PF00605	1
PF00610	1
PF00616	1
PF00623	1
PF00628	1
PF00634	1
PF00642	1
PF00650	1
PF00651	1
PF00701	1
PF00702	1
PF00728	1
PF00730	1
PF00753	1
PF00773	1
PF00778	1
PF00780	1
PF00784	1
PF00809	1
PF00817	1
PF00829	1
PF00859	1
PF00861	1
PF00884	1
PF00886	1
PF00887	1
PF00891	1
PF00892	1
PF00928	1
PF00992	1
PF00999	1
PF01016	1
PF01040	1
PF01079	1
PF01080	1
PF01085	1
PF01112	1
PF01124	1
PF01125	1
PF01176	1
PF01189	1
PF01196	1
PF01202	1
PF01239	1
PF01245	1
PF01250	1
PF01255	1
PF01275	1
PF01284	1
PF01299	1
PF01321	1
PF01335	1
PF01336	1
PF01352	1
PF01368	1
PF01388	1
PF01391	1
PF01399	1
PF01416	1
PF01429	1
PF01448	1
PF01471	1
PF01480	1
PF01501	1
PF01509	1
PF01541	1
PF01545	1
PF01565	1
PF01571	1
PF01582	1
PF01597	1
PF01608	1
PF01612	1
PF01619	1
PF01632	1
PF01636	1
PF01661	1
PF01663	1
PF01694	1
PF01704	1
PF01709	1
PF01712	1
PF01725	1
PF01764	1
PF01778	1
PF01783	1
PF01841	1
PF01847	1
PF01871	1
PF01876	1
PF01885	1
PF01902	1
PF01909	1
PF01918	1
PF01920	1
PF01926	1
PF01931	1
PF01936	1
PF01940	1
PF01958	1
PF01963	1
PF01974	1
PF01981	1
PF02002	1
PF02020	1
PF02078	1
PF02089	1
PF02100	1
PF02157	1
PF02179	1
PF02201	1
PF02204	1
PF02207	1
PF02210	1
PF02213	1
PF02256	1
PF02259	1
PF02260	1
PF02291	1
PF02301	1
PF02310	1
PF02330	1
PF02351	1
PF02368	1
PF02373	1
PF02391	1
PF02410	1
PF02437	1
PF02460	1
PF02493	1
PF02545	1
PF02574	1
PF02607	1
PF02617	1
PF02628	1
PF02671	1
PF02686	1
PF02724	1
PF02729	1
PF02732	1
PF02743	1
PF02750	1
PF02755	1
PF02759	1
PF02782	1
PF02833	1
PF02847	1
PF02854	1
PF02862	1
PF02893	1
PF02902	1
PF02906	1
PF02913	1
PF02926	1
PF02935	1
PF02937	1
PF02939	1
PF02965	1
PF02970	1
PF02985	1
PF03029	1
PF03031	1
PF03036	1
PF03083	1
PF03097	1
PF03114	1
PF03148	1
PF03164	1
PF03165	1
PF03189	1
PF03199	1
PF03256	1
PF03281	1
PF03283	1
PF03291	1
PF03321	1
PF03344	1
PF03351	1
PF03399	1
PF03463	1
PF03464	1
PF03465	1
PF03517	1
PF03528	1
PF03547	1
PF03567	1
PF03607	1
PF03619	1
PF03643	1
PF03666	1
PF03694	1
PF03715	1
PF03747	1
PF03807	1
PF03821	1
PF03834	1
PF03836	1
PF03853	1
PF03870	1
PF03874	1
PF03879	1
PF03896	1
PF03901	1
PF03908	1
PF03915	1
PF03917	1
PF03959	1
PF03962	1
PF03981	1
PF04000	1
PF04031	1
PF04048	1
PF04055	1
PF04057	1
PF04080	1
PF04112	1
PF04114	1
PF04117	1
PF04127	1
PF04130	1
PF04142	1
PF04148	1
PF04161	1
PF04176	1
PF04180	1
PF04182	1
PF04188	1
PF04193	1
PF04194	1
PF04201	1
PF04241	1
PF04281	1
PF04402	1
PF04419	1
PF04420	1
PF04433	1
PF04440	1
PF04442	1
PF04499	1
PF04506	1
PF04568	1
PF04577	1
PF04588	1
PF04589	1
PF04598	1
PF04641	1
PF04658	1
PF04667	1
PF04669	1
PF04683	1
PF04696	1
PF04697	1
PF04721	1
PF04727	1
PF04750	1
PF04757	1
PF04768	1
PF04774	1
PF04791	1
PF04802	1
PF04821	1
PF04825	1
PF04832	1
PF04836	1
PF04849	1
PF04880	1
PF04884	1
PF04889	1
PF04908	1
PF04930	1
PF04935	1
PF04983	1
PF04987	1
PF04997	1
PF04998	1
PF05000	1
PF05004	1
PF05018	1
PF05024	1
PF05029	1
PF05044	1
PF05046	1
PF05047	1
PF05053	1
PF05066	1
PF05071	1
PF05104	1
PF05132	1
PF05160	1
PF05175	1
PF05178	1
PF05241	1
PF05251	1
PF05253	1
PF05254	1
PF05276	1
PF05281	1
PF05283	1
PF05285	1
PF05308	1
PF05328	1
PF05348	1
PF05368	1
PF05422	1
PF05427	1
PF05428	1
PF05434	1
PF05450	1
PF05454	1
PF05478	1
PF05529	1
PF05557	1
PF05609	1
PF05615	1
PF05625	1
PF05645	1
PF05648	1
PF05652	1
PF05667	1
PF05669	1
PF05679	1
PF05680	1
PF05705	1
PF05712	1
PF05721	1
PF05729	1
PF05739	1
PF05741	1
PF05746	1
PF05769	1
PF05773	1
PF05781	1
PF05806	1
PF05873	1
PF05915	1
PF06046	1
PF06052	1
PF06058	1
PF06087	1
PF06090	1
PF06113	1
PF06179	1
PF06209	1
PF06212	1
PF06220	1
PF06248	1
PF06271	1
PF06294	1
PF06331	1
PF06372	1
PF06417	1
PF06419	1
PF06423	1
PF06428	1
PF06463	1
PF06468	1
PF06482	1
PF06544	1
PF06584	1
PF06602	1
PF06657	1
PF06663	1
PF06730	1
PF06747	1
PF06762	1
PF06784	1
PF06840	1
PF06842	1
PF06886	1
PF06916	1
PF06979	1
PF06984	1
PF07000	1
PF07052	1
PF07064	1
PF07086	1
PF07096	1
PF07111	1
PF07200	1
PF07264	1
PF07289	1
PF07324	1
PF07347	1
PF07412	1
PF07426	1
PF07496	1
PF07539	1
PF07648	1
PF07651	1
PF07653	1
PF07687	1
PF07774	1
PF07798	1
PF07807	1
PF07808	1
PF07814	1
PF07815	1
PF07834	1
PF07855	1
PF07856	1
PF07888	1
PF07890	1
PF07904	1
PF07926	1
PF07928	1
PF07985	1
PF07992	1
PF08014	1
PF08016	1
PF08032	1
PF08059	1
PF08065	1
PF08122	1
PF08123	1
PF08146	1
PF08158	1
PF08209	1
PF08221	1
PF08240	1
PF08265	1
PF08271	1
PF08285	1
PF08292	1
PF08311	1
PF08312	1
PF08318	1
PF08320	1
PF08377	1
PF08399	1
PF08416	1
PF08418	1
PF08423	1
PF08539	1
PF08544	1
PF08561	1
PF08571	1
PF08572	1
PF08577	1
PF08583	1
PF08585	1
PF08597	1
PF08598	1
PF08599	1
PF08609	1
PF08610	1
PF08612	1
PF08613	1
PF08617	1
PF08623	1
PF08631	1
PF08638	1
PF08646	1
PF08647	1
PF08648	1
PF08660	1
PF08661	1
PF08669	1
PF08683	1
PF08695	1
PF08698	1
PF08737	1
PF08755	1
PF08766	1
PF08771	1
PF08784	1
PF08806	1
PF08833	1
PF08839	1
PF08916	1
PF08923	1
PF08961	1
PF08991	1
PF08997	1
PF09038	1
PF09041	1
PF09103	1
PF09104	1
PF09121	1
PF09169	1
PF09172	1
PF09273	1
PF09282	1
PF09289	1
PF09302	1
PF09311	1
PF09324	1
PF09325	1
PF09340	1
PF09368	1
PF09398	1
PF09404	1
PF09409	1
PF09430	1
PF09445	1
PF09468	1
PF09469	1
PF09531	1
PF09532	1
PF09637	1
PF09727	1
PF09728	1
PF09731	1
PF09733	1
PF09734	1
PF09735	1
PF09738	1
PF09742	1
PF09745	1
PF09746	1
PF09752	1
PF09754	1
PF09763	1
PF09769	1
PF09770	1
PF09777	1
PF09781	1
PF09787	1
PF09793	1
PF09794	1
PF09799	1
PF09801	1
PF09808	1
PF09812	1
PF09814	1
PF09815	1
PF10018	1
PF10036	1
PF10037	1
PF10046	1
PF10146	1
PF10149	1
PF10151	1
PF10155	1
PF10156	1
PF10158	1
PF10160	1
PF10161	1
PF10165	1
PF10171	1
PF10174	1
PF10178	1
PF10181	1
PF10183	1
PF10188	1
PF10190	1
PF10191	1
PF10193	1
PF10200	1
PF10205	1
PF10212	1
PF10215	1
PF10217	1
PF10218	1
PF10220	1
PF10221	1
PF10223	1
PF10225	1
PF10239	1
PF10240	1
PF10241	1
PF10244	1
PF10249	1
PF10254	1
PF10261	1
PF10263	1
PF10264	1
PF10269	1
PF10271	1
PF10277	1
PF10280	1
PF10283	1
PF10294	1
PF10304	1
PF10357	1
PF10363	1
PF10366	1
PF10367	1
PF10377	1
PF10427	1
PF10453	1
PF10469	1
PF10475	1
PF10484	1
PF10487	1
PF10493	1
PF10494	1
PF10495	1
PF10501	1
PF10505	1
PF10506	1
PF10516	1
PF10521	1
PF10522	1
PF10524	1
PF10534	1
PF10561	1
PF10568	1
PF10581	1
PF10595	1
PF10601	1
PF10607	1
PF10639	1
PF10744	1
PF11261	1
PF11470	1
PF11488	1
PF11521	1
PF11527	1
PF11559	1
PF11571	1
PF11573	1
PF11600	1
PF11608	1
PF11704	1
PF11705	1
PF11707	1
PF11712	1
PF11717	1
PF11721	1
PF11779	1
PF11799	1
PF11801	1
PF11819	1
PF11841	1
PF11865	1
PF11911	1
PF11945	1
PF11969	1
PF11971	1
PF12129	1
PF12214	1
PF12231	1
PF12251	1
PF12253	1
PF12297	1
PF12325	1
PF12329	1
PF12371	1
PF12372	1
PF12397	1
PF12402	1
PF12443	1
PF12460	1
PF12478	1
PF12489	1
PF12509	1
PF12516	1
PF12540	1
PF12542	1
PF12572	1
PF12576	1
PF12632	1
PF12657	1
PF12660	1
PF12689	1
PF12695	1
PF12701	1
PF12705	1
PF12719	1
PF12752	1
PF12862	1
PF12872	1
PF12894	1
PF12895	1
PF12896	1
PF12926	1
PF12931	1
PF12932	1
PF12936	1
PF12999	1
PF13015	1
PF13091	1
PF13167	1
PF13191	1
PF13202	1
PF13232	1
PF13238	1
PF13242	1
PF13251	1
PF13300	1
PF13344	1
PF13349	1
PF13353	1
PF13361	1
PF13369	1
PF13371	1
PF13383	1
PF13385	1
PF13401	1
PF13402	1
PF13415	1
PF13419	1
PF13429	1
PF13450	1
PF13460	1
PF13469	1
PF13489	1
PF13532	1
PF13540	1
PF13564	1
PF13579	1
PF13602	1
PF13631	1
PF13637	1
PF13646	1
PF13664	1
PF13695	1
PF13775	1
PF13815	1
PF13838	1
PF13839	1
PF13847	1
PF13862	1
PF13863	1
PF13874	1
PF13878	1
PF13880	1
PF13886	1
PF13889	1
PF13891	1
PF13896	1
PF13897	1
PF13904	1
PF13912	1
PF13913	1
PF13915	1
PF13919	1
PF13922	1
PF13923	1
PF13934	1
PF14048	1
PF14073	1
PF14138	1
PF14259	1
PF14291	1
PF14377	1
PF14469	1
PF14497	1
PF14500	1
PF14520	1
PF14629	1
PF14645	1
PF14646	1
PF14649	1
PF14655	1
PF14656	1
PF14661	1
PF14663	1
PF14664	1
PF14665	1
PF14666	1
PF14668	1
PF14709	1
PF14712	1
PF14721	1
PF14724	1
PF14726	1
PF14727	1
PF14728	1
PF14737	1
PF14740	1
PF14748	1
PF14752	1
PF14764	1
PF14766	1
PF14767	1
PF14768	1
PF14769	1
PF14772	1
PF14774	1
PF14778	1
PF14784	1
PF14825	1
PF14828	1
PF14846	1
PF14852	1
PF14853	1
PF14858	1
PF14874	1
PF14886	1
PF14892	1
PF14895	1
PF14906	1
PF14908	1
PF14916	1
PF14917	1
PF14918	1
PF14919	1
PF14920	1
PF14923	1
PF14924	1
PF14925	1
PF14927	1
PF14931	1
PF14933	1
PF14934	1
PF14935	1
PF14938	1
PF14949	1
PF14960	1
PF14964	1
PF14970	1
PF14971	1
PF14974	1
PF14975	1
PF14977	1
PF14983	1
PF14988	1
PF14995	1
PF14996	1
PF15006	1
PF15007	1
PF15035	1
PF15045	1
PF15046	1
PF15057	1
PF15061	1
PF15065	1
PF15070	1
PF15072	1
PF15073	1
PF15074	1
PF15075	1
PF15084	1
PF15086	1
PF15092	1
PF15093	1
PF15111	1
PF15139	1
PF15160	1
PF15235	1
PF15236	1
PF15244	1
PF15247	1
PF15251	1
PF15264	1
PF15276	1
PF15277	1
PF15281	1
PF15299	1
PF15305	1
PF15311	1
PF15320	1
PF15326	1
PF15353	1
PF15369	1
PF15372	1
PF15383	1
PF15391	1
PF15392	1
PF15393	1
PF15397	1
PF15454	1
PF15469	1
PF15478	1
PF15479	1
PF15501	1
PF15503	1
PF15539	1
PF15554	1
PF15557	1
PF15558	1
PF15619	1
PF15667	1
PF15669	1
PF15678	1
PF15691	1
PF15693	1
PF15694	1
PF15705	1
PF15706	1
PF15709	1
PF15712	1
PF15717	1
PF15734	1
PF15743	1
PF15749	1
PF15769	1
PF15786	1
PF15800	1
PF15852	1
PF15871	1
PF15877	1
PF15879	1
PF15884	1
PF15903	1
PF15904	1
PF15920	1
PF15921	1
PF15926	1
PF15961	1
PF15963	1
PF15964	1
PF15967	1
PF15985	1
PF16002	1
PF16025	1
PF16026	1
PF16044	1
PF16045	1
PF16046	1
PF16070	1
PF16088	1
PF16094	1
PF16099	1
PF16158	1
PF16174	1
PF16188	1
PF16189	1
PF16201	1
PF16213	1
PF16294	1
PF16360	1
PF16457	1
PF16482	1
PF16501	1
PF16508	1
PF16515	1
PF16528	1
PF16545	1
PF16550	1
PF16563	1
PF16564	1
PF16574	1
PF16597	1
PF16598	1
PF16608	1
PF16646	1
PF16672	1
PF16679	1
PF16687	1
PF16727	1
PF16741	1
PF16746	1
PF16748	1
PF16766	1
PF16768	1
PF16769	1
PF16864	1
PF16900	1
PF16953	1
PF16954	1
PF16978	1
PF16979	1
PF17034	1
PF17045	1
PF17069	1
PF17095	1
