# Supplementary material for: Increased taxon sampling reveals thousands of hidden orthologs in flatworms
Source: HighWire-hosted journal article supplement (doi:10.1101/gr.216226.116), 2017-04-11
Supplement: Supplemental_Table_9.xlsx [file Supplemental_Table_9.xlsx]

## Sheet: Biological Process
GO Term	Description	pValue
GO:0070124	mitochondrial translational initiation	2.685949E-12
GO:0070126	mitochondrial translational termination	4.07029E-12
GO:0070125	mitochondrial translational elongation	6.049507E-12
GO:0032543	mitochondrial translation	4.755332E-7
GO:0016064	immunoglobulin mediated immune response	1.375769E-6
GO:0019724	B cell mediated immunity	1.375769E-6
GO:0002204	somatic recombination of immunoglobulin genes involved in immune response	6.513634E-5
GO:0002208	somatic diversification of immunoglobulins involved in immune response	6.513634E-5
GO:0002381	immunoglobulin production involved in immunoglobulin mediated immune response	6.513634E-5
GO:0045190	isotype switching	6.513634E-5
GO:0042791	5S class rRNA transcription from RNA polymerase III type 1 promoter	1.141921E-4
GO:0006415	translational termination	1.539643E-4
GO:0006383	transcription from RNA polymerase III promoter	2.528734E-4
GO:0016447	somatic recombination of immunoglobulin gene segments	4.037703E-4
GO:0006414	translational elongation	7.531997E-4
GO:0006384	transcription initiation from RNA polymerase III promoter	1.665046E-3
GO:0016445	somatic diversification of immunoglobulins	1.830054E-3
GO:0006413	translational initiation	2.525492E-3
GO:0002312	B cell activation involved in immune response	2.624142E-3
GO:0006310	DNA recombination	3.143748E-3
GO:0006386	termination of RNA polymerase III transcription	4.856105E-3
GO:0002562	somatic diversification of immune receptors via germline recombination within a single locus	5.212868E-3
GO:0006385	transcription elongation from RNA polymerase III promoter	5.893591E-3
GO:0098534	centriole assembly	7.195414E-3
GO:0007099	centriole replication	7.195414E-3
GO:0042797	tRNA transcription from RNA polymerase III promoter	8.241445E-3
GO:0009304	tRNA transcription	8.241445E-3
GO:0006354	DNA-templated transcription, elongation	9.537265E-3
GO:0016444	somatic cell DNA recombination	1.022487E-2
GO:0002200	somatic diversification of immune receptors	1.022487E-2
GO:0006798	polyphosphate catabolic process	1.071556E-2
GO:0006797	polyphosphate metabolic process	1.071556E-2
GO:0032747	positive regulation of interleukin-23 production	1.071556E-2
GO:0016598	protein arginylation	1.071556E-2
GO:0003026	regulation of systemic arterial blood pressure by aortic arch baroreceptor feedback	1.071556E-2
GO:0016340	calcium-dependent cell-matrix adhesion	1.071556E-2
GO:0039536	negative regulation of RIG-I signaling pathway	1.071556E-2
GO:0038203	TORC2 signaling	1.071556E-2
GO:0030999	linear element assembly	1.071556E-2
GO:0051152	positive regulation of smooth muscle cell differentiation	1.071556E-2
GO:0097352	autophagosome maturation	1.071556E-2
GO:1902047	polyamine transmembrane transport	1.071556E-2
GO:0097111	endoplasmic reticulum-Golgi intermediate compartment organization	1.071556E-2
GO:0061436	establishment of skin barrier	1.071556E-2
GO:1903621	protein localization to photoreceptor connecting cilium	1.071556E-2
GO:0097370	protein O-GlcNAcylation via threonine	1.071556E-2
GO:1902267	regulation of polyamine transmembrane transport	1.071556E-2
GO:1902268	negative regulation of polyamine transmembrane transport	1.071556E-2
GO:2000314	negative regulation of fibroblast growth factor receptor signaling pathway involved in neural plate anterior/posterior pattern formation	1.071556E-2
GO:0035753	maintenance of DNA trinucleotide repeats	1.071556E-2
GO:0010448	vegetative meristem growth	1.071556E-2
GO:0072742	SAGA complex localization to transcription regulatory region	1.071556E-2
GO:0045830	positive regulation of isotype switching	1.071556E-2
GO:0021682	nerve maturation	1.071556E-2
GO:0022900	electron transport chain	1.215289E-2
GO:0043624	cellular protein complex disassembly	1.309857E-2
GO:0032981	mitochondrial respiratory chain complex I assembly	1.560901E-2
GO:0010257	NADH dehydrogenase complex assembly	1.560901E-2
GO:0009303	rRNA transcription	1.560901E-2
GO:0034723	DNA replication-dependent nucleosome organization	1.560901E-2
GO:0006335	DNA replication-dependent nucleosome assembly	1.560901E-2
GO:0016226	iron-sulfur cluster assembly	1.911465E-2
GO:0016180	snRNA processing	1.911465E-2
GO:0097031	mitochondrial respiratory chain complex I biogenesis	1.911465E-2
GO:0031163	metallo-sulfur cluster assembly	1.911465E-2
GO:0032008	positive regulation of TOR signaling	2.097975E-2
GO:0031424	keratinization	2.131693E-2
GO:0042033	chemokine biosynthetic process	2.131693E-2
GO:0003144	embryonic heart tube formation	2.131693E-2
GO:0016338	calcium-independent cell-cell adhesion via plasma membrane cell-adhesion molecules	2.131693E-2
GO:0002295	T-helper cell lineage commitment	2.131693E-2
GO:0039532	negative regulation of viral-induced cytoplasmic pattern recognition receptor signaling pathway	2.131693E-2
GO:0039534	negative regulation of MDA-5 signaling pathway	2.131693E-2
GO:0015793	glycerol transport	2.131693E-2
GO:0050755	chemokine metabolic process	2.131693E-2
GO:0098535	de novo centriole assembly	2.131693E-2
GO:0048388	endosomal lumen acidification	2.131693E-2
GO:0072540	T-helper 17 cell lineage commitment	2.131693E-2
GO:0010213	non-photoreactive DNA repair	2.131693E-2
GO:0045073	regulation of chemokine biosynthetic process	2.131693E-2
GO:0045080	positive regulation of chemokine biosynthetic process	2.131693E-2
GO:0045006	DNA deamination	2.131693E-2
GO:0000720	pyrimidine dimer repair by nucleotide-excision repair	2.131693E-2
GO:0071679	commissural neuron axon guidance	2.131693E-2
GO:0032066	nucleolus to nucleoplasm transport	2.131693E-2
GO:1901917	regulation of exoribonuclease activity	2.131693E-2
GO:1901919	positive regulation of exoribonuclease activity	2.131693E-2
GO:0045191	regulation of isotype switching	2.131693E-2
GO:0048821	erythrocyte development	2.291734E-2
GO:0043241	protein complex disassembly	2.421001E-2
GO:0002250	adaptive immune response	2.683423E-2
GO:0033108	mitochondrial respiratory chain complex assembly	2.914761E-2
GO:0042113	B cell activation	2.973195E-2
GO:0043363	nucleate erythrocyte differentiation	3.180532E-2
GO:0043369	CD4-positive or CD8-positive, alpha-beta T cell lineage commitment	3.180532E-2
GO:0043373	CD4-positive, alpha-beta T cell lineage commitment	3.180532E-2
GO:0044838	cell quiescence	3.180532E-2
GO:0030221	basophil differentiation	3.180532E-2
GO:0003142	cardiogenic plate morphogenesis	3.180532E-2
GO:0042832	defense response to protozoan	3.180532E-2
GO:0002360	T cell lineage commitment	3.180532E-2
GO:0002363	alpha-beta T cell lineage commitment	3.180532E-2
GO:0003342	proepicardium development	3.180532E-2
GO:0003343	septum transversum development	3.180532E-2
GO:0002714	positive regulation of B cell mediated immunity	3.180532E-2
GO:0015846	polyamine transport	3.180532E-2
GO:0036297	interstrand cross-link repair	3.180532E-2
GO:0002891	positive regulation of immunoglobulin mediated immune response	3.180532E-2
GO:2000313	regulation of fibroblast growth factor receptor signaling pathway involved in neural plate anterior/posterior pattern formation	3.180532E-2
GO:0048823	nucleate erythrocyte development	3.180532E-2
GO:0045041	protein import into mitochondrial intermembrane space	3.180532E-2
GO:0060375	regulation of mast cell differentiation	3.180532E-2
GO:0060825	fibroblast growth factor receptor signaling pathway involved in neural plate anterior/posterior pattern formation	3.180532E-2
GO:0006294	nucleotide-excision repair, preincision complex assembly	3.180532E-2
GO:0007597	blood coagulation, intrinsic pathway	3.180532E-2
GO:0033561	regulation of water loss via skin	3.180532E-2
GO:0071873	response to norepinephrine	3.180532E-2
GO:0071908	determination of intestine left/right asymmetry	3.180532E-2
GO:0044782	cilium organization	3.4694E-2
GO:0034453	microtubule anchoring	3.651358E-2
GO:0032984	macromolecular complex disassembly	3.692095E-2
GO:0006353	DNA-templated transcription, termination	3.917215E-2
GO:0030521	androgen receptor signaling pathway	4.069567E-2
GO:0042346	positive regulation of NF-kappaB import into nucleus	4.218192E-2
GO:0006958	complement activation, classical pathway	4.218192E-2
GO:0015840	urea transport	4.218192E-2
GO:0060217	hemangioblast cell differentiation	4.218192E-2
GO:1903546	protein localization to photoreceptor outer segment	4.218192E-2
GO:0036337	Fas signaling pathway	4.218192E-2
GO:1901668	regulation of superoxide dismutase activity	4.218192E-2
GO:1900029	positive regulation of ruffle assembly	4.218192E-2
GO:0000738	DNA catabolic process, exonucleolytic	4.218192E-2
GO:0000735	removal of nonhomologous ends	4.218192E-2
GO:0070315	G1 to G0 transition involved in cell differentiation	4.218192E-2
GO:0045351	type I interferon biosynthetic process	4.218192E-2
GO:0045498	sex comb development	4.218192E-2
GO:0070131	positive regulation of mitochondrial translation	4.218192E-2
GO:1901857	positive regulation of cellular respiration	4.218192E-2
GO:0080186	developmental vegetative growth	4.218192E-2
GO:0045799	positive regulation of chromatin assembly or disassembly	4.218192E-2
GO:0032205	negative regulation of telomere maintenance	4.218192E-2
GO:0021540	corpus callosum morphogenesis	4.218192E-2
GO:0002460	adaptive immune response based on somatic recombination of immune receptors built from immunoglobulin superfamily domains	4.285557E-2
GO:0002449	lymphocyte mediated immunity	4.728497E-2
GO:0016073	snRNA metabolic process	4.85341E-2

## Sheet: Molecular function
GO Term	Description	pValue
GO:0001056	RNA polymerase III activity	9.547724E-3
GO:0005121	Toll binding	1.071556E-2
GO:0005540	hyaluronic acid binding	1.071556E-2
GO:0004309	exopolyphosphatase activity	1.071556E-2
GO:0042979	ornithine decarboxylase regulator activity	1.071556E-2
GO:0050510	N-acetylgalactosaminyl-proteoglycan 3-beta-glucuronosyltransferase activity	1.071556E-2
GO:0097177	mitochondrial ribosome binding	1.071556E-2
GO:0001635	calcitonin gene-related peptide receptor activity	1.071556E-2
GO:0071209	U7 snRNA binding	1.071556E-2
GO:0008073	ornithine decarboxylase inhibitor activity	1.071556E-2
GO:0043237	laminin-1 binding	1.071556E-2
GO:0080048	GDP-D-glucose phosphorylase activity	1.071556E-2
GO:0001104	RNA polymerase II transcription cofactor activity	1.072021E-2
GO:0042809	vitamin D receptor binding	1.397212E-2
GO:0017178	diphthine-ammonia ligase activity	2.131693E-2
GO:0030984	kininogen binding	2.131693E-2
GO:0047238	glucuronosyl-N-acetylgalactosaminyl-proteoglycan 4-beta-N-acetylgalactosaminyltransferase activity	2.131693E-2
GO:0032184	SUMO polymer binding	2.131693E-2
GO:0008310	single-stranded DNA 3'-5' exodeoxyribonuclease activity	2.131693E-2
GO:0031071	cysteine desulfurase activity	2.131693E-2
GO:0003899	DNA-directed RNA polymerase activity	2.427848E-2
GO:0034062	RNA polymerase activity	2.427848E-2
GO:0003735	structural constituent of ribosome	2.473974E-2
GO:0001076	transcription factor activity, RNA polymerase II transcription factor binding	2.517624E-2
GO:0015250	water channel activity	3.180532E-2
GO:0004803	transposase activity	3.180532E-2
GO:0005484	SNAP receptor activity	3.596891E-2
GO:0000989	transcription factor activity, transcription factor binding	4.050504E-2
GO:0005372	water transmembrane transporter activity	4.218192E-2
GO:0005149	interleukin-1 receptor binding	4.218192E-2
GO:0048039	ubiquinone binding	4.218192E-2
GO:0000104	succinate dehydrogenase activity	4.218192E-2
GO:0000988	transcription factor activity, protein binding	4.470481E-2

## Sheet: Cellular compartment
GO Term	Description	pValue
GO:0005761	mitochondrial ribosome	3.874712E-8
GO:0000313	organellar ribosome	6.082026E-8
GO:0005743	mitochondrial inner membrane	9.08747E-7
GO:0019866	organelle inner membrane	6.385338E-6
GO:0005762	mitochondrial large ribosomal subunit	1.19113E-5
GO:0000315	organellar large ribosomal subunit	1.19113E-5
GO:0031966	mitochondrial membrane	4.538415E-5
GO:0000127	transcription factor TFIIIC complex	1.141921E-4
GO:0034451	centriolar satellite	1.145773E-4
GO:0005740	mitochondrial envelope	1.148281E-4
GO:0016592	mediator complex	1.352651E-4
GO:0005814	centriole	2.145332E-4
GO:0044450	microtubule organizing center part	2.29877E-4
GO:0005759	mitochondrial matrix	3.182668E-4
GO:0044429	mitochondrial part	3.871092E-4
GO:0031932	TORC2 complex	6.755097E-4
GO:0090576	RNA polymerase III transcription factor complex	6.755097E-4
GO:0000428	DNA-directed RNA polymerase complex	8.879573E-4
GO:0055029	nuclear DNA-directed RNA polymerase complex	8.879573E-4
GO:0030880	RNA polymerase complex	1.17393E-3
GO:0044451	nucleoplasm part	1.621315E-3
GO:0000922	spindle pole	2.480261E-3
GO:0032039	integrator complex	3.064488E-3
GO:0031975	envelope	4.065514E-3
GO:0038201	TOR complex	4.856105E-3
GO:0036064	ciliary basal body	7.157145E-3
GO:0031967	organelle envelope	7.174987E-3
GO:0000777	condensed chromosome kinetochore	8.937888E-3
GO:1990316	ATG1/UKL1 kinase complex	1.071556E-2
GO:1990221	L-cysteine desulfurase complex	1.071556E-2
GO:0009360	DNA polymerase III complex	1.071556E-2
GO:0005654	nucleoplasm	1.132707E-2
GO:0016021	integral component of membrane	1.28182E-2
GO:0044455	mitochondrial membrane part	1.308156E-2
GO:0032580	Golgi cisterna membrane	1.560901E-2
GO:0005763	mitochondrial small ribosomal subunit	1.73238E-2
GO:0000779	condensed chromosome, centromeric region	1.821405E-2
GO:0005840	ribosome	1.875464E-2
GO:0031305	integral component of mitochondrial inner membrane	1.911465E-2
GO:0031974	membrane-enclosed lumen	1.93314E-2
GO:0070013	intracellular organelle lumen	1.935473E-2
GO:0000314	organellar small ribosomal subunit	2.097975E-2
GO:0031304	intrinsic component of mitochondrial inner membrane	2.097975E-2
GO:0030868	smooth endoplasmic reticulum membrane	2.131693E-2
GO:0097425	smooth endoplasmic reticulum part	2.131693E-2
GO:0097504	Gemini of coiled bodies	2.131693E-2
GO:0098536	deuterosome	2.131693E-2
GO:0001652	granular component	2.131693E-2
GO:0032021	NELF complex	2.131693E-2
GO:0005815	microtubule organizing center	2.328422E-2
GO:0043233	organelle lumen	2.32855E-2
GO:0031224	intrinsic component of membrane	2.401168E-2
GO:0005666	DNA-directed RNA polymerase III complex	2.492565E-2
GO:0005742	mitochondrial outer membrane translocase complex	3.180532E-2
GO:0035068	micro-ribonucleoprotein complex	3.180532E-2
GO:0045095	keratin filament	3.180532E-2
GO:0033193	Lsd1/2 complex	3.180532E-2
GO:0044294	dendritic growth cone	3.180532E-2
GO:0016591	DNA-directed RNA polymerase II, holoenzyme	3.427698E-2
GO:0035869	ciliary transition zone	3.596891E-2
GO:0061695	transferase complex, transferring phosphorus-containing groups	3.617038E-2
GO:0098798	mitochondrial protein complex	3.81628E-2
GO:0005749	mitochondrial respiratory chain complex II, succinate dehydrogenase complex (ubiquinone)	4.218192E-2
GO:0000110	nucleotide-excision repair factor 1 complex	4.218192E-2
GO:0000276	mitochondrial proton-transporting ATP synthase complex, coupling factor F(o)	4.218192E-2
GO:0045257	succinate dehydrogenase complex (ubiquinone)	4.218192E-2
GO:0045273	respiratory chain complex II	4.218192E-2
GO:0045283	fumarate reductase complex	4.218192E-2
GO:0045281	succinate dehydrogenase complex	4.218192E-2
GO:0070522	ERCC4-ERCC1 complex	4.218192E-2
